1 **Enlarged cortical cells and reduced cortical cell file number improve growth under**  
2 **suboptimal nitrogen, phosphorus and potassium availability**

3 Xiyu Yang, Miranda Niemiec, Jonathan P. Lynch\*

4 Department of Plant Science, The Pennsylvania State University, University Park, PA, U.S.A.,  
5 16802

6 Xiyu Yang: [xby5025@psu.edu](mailto:xby5025@psu.edu)

7 Miranda Niemiec: [mdn22@psu.edu](mailto:mdn22@psu.edu)

8 Jonathan P. Lynch: [jpl4@psu.edu](mailto:jpl4@psu.edu)

9 \*For Correspondence. Email: [jpl4@psu.edu](mailto:jpl4@psu.edu), Tel.: +1 8148632256

10 Date of Submission:

11 Number of Figures: 9

12 Word Count:

13

14

15

16

17

18 **Title:** Enlarged cortical cells and reduced cortical cell file number improve growth under  
19 suboptimal nitrogen, phosphorus and potassium availability

20 **Short title:** Root cortical anatomy and nutrient capture

21 Xiyu Yang, Miranda Niemiec, Jonathan P. Lynch\*

22 Department of Plant Science, The Pennsylvania State University, University Park, PA, U.S.A.,  
23 16802

24 **Author contributions:** XY conducted the experiments, analyzed data, and wrote the article. MN  
25 contributed to data analysis, figure creation, and writing. JPL conceived and supervised the  
26 project and contributed to data analysis and writing. JPL agrees to serve as corresponding author.

27 **One sentence summary:** Functional-structural modeling indicates that enlarged root cortical cells  
28 and reduced cortical cell file number decrease root maintenance cost, permitting greater soil  
29 exploration, resource capture, and plant growth under suboptimal nitrogen, phosphorus and  
30 potassium availability.

### 31 **Abstract**

32 Reduced cortical cell files (CCFN) and enlarged cortical cells (CCS) reduce root maintenance costs.  
33 We used *OpenSimRoot*, a functional-structural model, to test the hypothesis that larger CCS,  
34 reduced CCFN, and their interactions with root cortical aerenchyma (RCA), are useful adaptations  
35 to suboptimal soil N, P, and K availability. Interactions of CCS and CCFN with lateral root  
36 branching density (LRBD) and increased carbon availability were evaluated under limited N, P and  
37 K availability. The combination of larger CCS and reduced CCFN increases the growth of maize  
38 up to 105%, 106%, and 144%, respectively, under limited N, P, or K availability. Interactions  
39 among larger CCS, reduced CCFN, and greater RCA results in combined growth benefits of up to  
40 135%, 132%, and 161% under limited N, P, and K levels, respectively. Under low phosphorus and  
41 potassium availability, increased LRBD approximately doubles the utility of larger CCS and  
42 reduced CCFN. The utility of larger CCS and reduced CCFN is reduced by greater C availability  
43 as may occur in future climate scenarios. Our results support the hypothesis that larger CCS,  
44 reduced CCFN, and their interactions with RCA could increase nutrient acquisition by reducing  
45 root respiration and root nutrient demand. Phen synergisms may exist between CCS, CCFN, and  
46 LRBD. Natural genetic variation in CCS and CCFN merit consideration for breeding cereal crops  
47 with improved nutrient acquisition, which is critical for global food security.

48 **Keywords:** *Zea mays*, root cortical aerenchyma, cortical cell size, cortical cell file number, nutrient  
49 acquisition efficiency, *OpenSimRoot*, functional-structural plant model

50

### 51 **Abbreviations:**

52 Cortical cell size (CCS)

53 Cortical cell file number (CCFN)

54 Root cortical aerenchyma (RCA)

55 Steep, Cheap and Deep (SCD)

56 Lateral root branching density (LRBD)

57 Root hair length (RHL)

58 Basal root growth angle (BRGA)

## 59 **Introduction**

60 The development of crops with reduced fertilizer requirements is needed in global  
61 agriculture to reduce the environmental, economic, and energy costs of crop production in high-  
62 input agroecosystems and increase crop production in low-input agroecosystems (Koevoets et al.,  
63 2016; Lynch, 2019). One avenue towards this goal is via selection for root phenotypes that reduce  
64 the metabolic cost of soil exploration (Lynch, 2015). The metabolic costs of root tissues can be  
65 estimated as the investment of limiting resources, mainly carbohydrates and limiting mineral  
66 nutrients, in root growth and maintenance, and are important drivers of tolerance to edaphic stress  
67 (Chimungu et al., 2015a; Lynch, 2015; Postma and Lynch, 2011a; Saengwilai et al., 2014; Zhu et  
68 al., 2010a). The carbon cost of soil exploration includes carbon expenditure in root tissue  
69 construction and maintenance and ion uptake and assimilation (Nielsen et al., 1994, 2001). Of these,  
70 maintenance respiration is the largest carbon cost over time. Root metabolic costs at low nutrient  
71 availability are significantly greater than rates at high nutrient availability (Lambers et al., 2008;  
72 Nielsen et al., 2001). Root respiration is also a major cause of growth reduction under nutrient stress  
73 (Postma and Lynch, 2011), the consumption of carbon by root respiration can exceed 50% of daily  
74 photosynthesis under suboptimal nutrient levels (Ho et al., 2005; Lambers and Oliveira, 2020;  
75 Nielsen et al., 2001). Therefore, phenes, i.e., the basic unit of the phenotype, and phene states, i.e.,  
76 the status of specific phenes (Lynch, 2011; Pieruschka and Poorter, 2012; York et al., 2013), that  
77 reduce maintenance respiration allow more internal resources to be allocated to better root  
78 establishment, thus improving crop growth under limited nutrient availability, and therefore present  
79 opportunities for the development of crops with reduced nutrient requirements (Lynch, 2015).

80 The “Steep, Cheap and Deep” (SCD) ideotype proposes maize root phenotypes to optimize  
81 water and N capture under limited availability of those resources (Lynch, 2013). This ideotype  
82 consists of root anatomical, architectural and physiological phenes that increase root depth, and  
83 improve the acquisition of resources from deep soil domains. By determining the proportion of  
84 respiring to non-respiring root tissue affecting the carbon and nutrient cost of tissue construction  
85 and maintenance, root anatomy regulates the metabolic cost of soil exploration and therefore is an  
86 important factor in the effects of edaphic stress on root and whole plant development (Fan et al.,  
87 2003; Jaramillo et al., 2013; Mano et al., 2006). The “topsoil foraging” ideotype for P capture (Ho  
88 et al., 2004; Lynch, 2011; Lynch and Brown, 2001; Richardson et al., 2011; Wang et al., 2010,  
89 Lynch, 2019) has been useful as a breeding goal in developing soybean and common bean cultivars  
90 that can enhance P acquisition in low phosphorus and drought environments (Burridge et al., 2019),  
91 with similar application for enhanced P acquisition in maize (Zhu et al., 2005), given that P is  
92 immobile in the soil strata, and is concentrated in the topsoil. Phene states that create a greater root  
93 surface area in the topsoil, such as shallow root angle (Lynch and Brown, 2001; Rubio et al., 2003;  
94 Zhu et al., 2005; Rangarajan et al., 2018) many hypocotyl-borne roots (Miller et al., 2003;  
95 Walk et al., 2006; Rangarajan et al., 2018), dense lateral branching (Zhu and Lynch, 2004;  
96 Jia et al., 2018), greater production of axial roots (Miguel et al., 2015, Walk et al., 2006;  
97 Rangarajan et al., 2018), RCA formation (Postma and Lynch, 2011a,b) and root hair formation  
98 (Zhu et al., 2010b; Miguel et al., 2015), have greater capacity of intercepting P, thus enhancing P  
99 uptake in the topsoil. This strategy may also be relevant to improving K acquisition in the topsoil  
100 under low K availability, as K is also relatively immobile (Lynch, 2019). Anatomical phene states

101 that contribute to reduced metabolic cost were also found to exhibit synergism with architectural  
102 phenes (Postma and Lynch, 2011a).

103 The formation of root cortical aerenchyma (RCA), the enlarged intercellular spaces that  
104 form through either programmed cell death or cell separation (Evans, 2003), is generally increased  
105 in response to hypoxia (Jackson and Armstrong, 1999) and various edaphic stresses, including  
106 suboptimal availability of phosphorus, nitrogen, sulfur, and water (Bouranis et al., 2003; Drew et  
107 al., 1989; Fan et al., 2003; Konings and Verschuren, 1980; Zhu et al., 2010a; Saengwilai et al.,  
108 2014; Chimungu et al., 2015; Galindo-Castañeda et al., 2019). RCA formation alleviates the  
109 limitation of hypoxia for root respiration with improved oxygen transport (Jackson and Armstrong,  
110 1999). The utility of RCA formation to maintain greater growth rates under various soil nutrient  
111 and drought stresses by remobilizing nutrients from the root cortex and reducing maintenance  
112 respiration has been demonstrated in several previous studies (Chimungu et al., 2015a; Fan et al.,  
113 2003; Galindo-Castañeda et al., 2019; Jaramillo et al., 2013; Postma and Lynch, 2011a; Saengwilai  
114 et al., 2014; Zhu et al., 2010a). However, the dynamic interaction between RCA and other  
115 anatomical phenes and their effects on growth requires further examination, as RCA formation  
116 reduces the proportion of root volume occupied by living cortical tissue, which is more  
117 metabolically demanding than stelar tissue (Lynch, 2013). Chimungu et al. (2014a, b) reported that  
118 reduction in the number of concentric layers of parenchyma cells in the cortex of the maize root,  
119 or cortical cell file number (CCFN), and increased volume of individual cortical parenchyma cells,  
120 or cortical cell size (CCS), could decrease the metabolic costs of root growth and maintenance, in  
121 terms of both the carbon cost of root respiration and the nutrient content of cortical tissue. In  
122 contrasting maize lines exposed to water deficit stress in controlled environments and the field,  
123 larger CCS and reduced CCFN were associated with reduced root respiration, deeper rooting,  
124 greater water capture, improved plant water status, and hence greater growth and yield (Chimungu  
125 et al., 2014a, b). However, the physiological utilities of larger cortical cells, reduced CCFN, and  
126 their interaction with RCA and root architectural phenes under nutrient deficiencies, are not known.

127 The utility of a root phene state under stress may be dependent on its interactions with other  
128 architectural and anatomical phenes. Phene synergism refers to the phenomenon where the  
129 combined effect of two or more phenes is greater than the additive sum of their individual effects.  
130 For example, in low P soils, common bean genotypes with long root hairs (RHL) and shallow basal  
131 root growth angle (BRGA) had three-fold greater biomass accumulation than genotypes with short  
132 root hairs and steep root angle, while only 89% greater biomass was contributed by RHL alone,  
133 and 58% by shallow BRGA alone (Miguel et al., 2015). In another study, RCA formation in lateral  
134 roots in genotypes with increased lateral root branching density had greater benefits for phosphorus  
135 acquisition (Postma and Lynch, 2011b) than the effect of RCA alone. Integration of anatomical  
136 phenes and architectural phenes of maize root systems are important for plant growth and nitrogen  
137 acquisition (York et al., 2013; York and Lynch, 2015). These potential synergisms may be useful  
138 for breeding crops with greater edaphic stress tolerance. However, interactions among phenes may  
139 also be antagonistic, i.e., the functional response of phene states in combination is worse than that  
140 expected from the sum of their responses in isolation. For example, at low soil N levels, a phenotype  
141 with increased LRBD combined with RCA formation caused 42% reduction in shoot dry weight,  
142 compared to the expected additive effects of this phenotype, which indicates a functional  
143 antagonism (Postma and Lynch, 2011b; York et al., 2013).

144 A quantitative understanding of the functional dependence of one phene on the expression  
145 of other phenes and interactions among phenes and environmental factors is important for probing  
146 phenotypic diversity and breeding utility. We hypothesize that larger CCS and reduced CCFN, in  
147 combination with RCA formation, would decrease root respiration and tissue nutrient content,  
148 which would result in greater root growth, more efficient acquisition of soil N, P and K, and better

149 root and whole plant establishment under suboptimal N, P, and K availability. We also hypothesize  
150 that the combined benefit of RCA, CCS, and CCFN is additive and is greater than the benefit of  
151 RCA alone. *OpenSimRoot*, a functional-structural plant model, was used to evaluate: (1) the utility  
152 of CCS, CCFN, and RCA under suboptimal N, P, and K availability, (2) potential synergism  
153 between CCS, CCFN, and LRBD, and (3) the benefit of CCS and CCFN under conditions of greater  
154 carbon availability as may occur with elevated atmospheric CO<sub>2</sub> concentration.

## 155 Results

156 When maize was grown under N stress in solution culture, IBM201 (genotype with reduced  
157 CCFN) showed lower N concentration in the roots, IBM30 (genotype with larger CCS) showed  
158 lower N concentration only in stems. Under sufficient P availability, both IBM201 and IBM30  
159 showed reduced P concentration in the roots. In addition, IBM201 showed lower P concentration  
160 in leaves. Under K stress, IBM201 showed reduced K concentration in root tissues but also  
161 increased K concentration in the stems (Fig. 1).

162 In the simulations, increased RCA, reduced CCFN, and larger CCS had positive effects on  
163 plant growth under limiting soil nitrogen, potassium and phosphorus as simulated independently  
164 (Fig. 2, Fig. 3, Fig. 4). Plants with larger CCS and reduced CCFN had greater rooting depth and  
165 greater uptake rate of nitrate at deeper soil strata as well (Fig. 2). Improved plant growth by larger  
166 and reduced CCFN was highly dependent on the intensity of nutrient stress and the specific nutrient  
167 simulated. Generally, at intermediate deficiency (i.e., plant dry weight at 30% - 50% of an  
168 unstressed reference), RCA formation, larger CCS and reduced CCFN exhibited the greatest  
169 beneficial effect when potassium was the limiting resource, while at severe deficiency (i.e., plant  
170 dry weight at 1% - 25% of an unstressed reference), the greatest beneficial effect was found when  
171 nitrogen and phosphorus were the limiting resources. Under N and P stress the utility of all three  
172 phenotypes generally decreased with increasing nutrient availability, while under potassium stress  
173 they benefited the plant the most at intermediate deficiency. Reduced nutrient content in root tissue  
174 contributed more towards the total improvement in growth of phenotypes with larger CCS and  
175 reduced CCFN than did reduced respiration. The total benefits of larger CCS or reduced CCFN  
176 were greater than summing respective benefits introduced by reduced nutrient content and reduced  
177 respiration (Fig. 3), and under extreme P and K stresses, were greater than the total benefit of RCA.  
178 For example, under extremely limiting nutrient levels (21 kg/ha N, 0.05 kg/ha P), large CCS  
179 increased biomass 47% (N stress) and 56% (P stress), while the reduction in respiration contributed  
180 only 16% (N stress) and 14% (P stress), and reduced nutrient content only 18% (N stress) and 23%  
181 (P stress). Under moderate K stress (1.9 kg/ha), reduction in respiration caused by larger CCS  
182 contributed 30% and reduced nutrient content 18% towards growth benefits, while enabling both  
183 functions resulted in a 69% growth enhancements, 21% higher than the additive terms of the two  
184 functions, indicating synergism.

185 Predicted benefits of reducing respiration and nutrient concentration would increase in  
186 general as cell size increases and file number decreases within the range of observed variation (Fig.  
187 5). At extremely low soil nutrient availabilities (10% of sufficient soil nitrate and potassium  
188 availabilities, 1% of sufficient soil phosphorus availability), larger CCS and reduced CCFN did not  
189 achieve the most substantial enhancement of plant growth, which were found at moderately low  
190 soil nutrient availability (20% of sufficient soil nitrate availability, 8% of sufficient soil phosphorus  
191 availability and 25% of sufficient soil potassium availability).

192 We simulated the timing and development of nitrogen and phosphorus stress in plants with  
193 only RCA formation, with both RCA formation and larger CCS, or with both RCA formation and  
194 reduced CCFN independently. Plants with either larger CCS or reduced CCFN present along with

195 RCA formation were slightly less nitrogen and phosphorus stressed in that nutrient stress was  
196 delayed approximately 1-3 additional days by both phenotypes (Fig. 6). With decreases in nutrient  
197 availability, stresses developed earlier and were more severe in the phenotypes without RCA  
198 formation, or larger CCS, or reduced CCFN than the ones with these phenotypes. RCA formation,  
199 CCS and CCFN could alleviate nitrogen or phosphorus stress in terms of both duration and severity  
200 of stress.

201 We used a high RCA phenotype with large CCS and reduced CCFN to simulate the  
202 beneficial effects of large CCS and reduced CCFN before and after RCA formation, and their  
203 interactions after RCA formation under nitrogen, phosphorus and potassium deficiency (Fig. 7).  
204 Both CCS and CCFN had initial benefits at the very beginning of growth, and both continuously  
205 increased dry weight until RCA formation, which replaced root cortical cells and cell files with  
206 large intercellular spaces. Over time, by reducing nutrient content in the root, larger CCS and  
207 reduced CCFN contributed more to growth enhancement than that of respiration reduction under  
208 N or P stress, while respiration reduction contributed more under K stress. RCA formation was at  
209 a minimal level initially, but increased substantially under suboptimal levels of all three nutrients  
210 at 15 DAG, which corresponded to the time nutrient stress was perceived due to exhausted seed  
211 reserves. After the substantial increase in RCA formation, RCA was responsible for the majority  
212 of benefits under nutrient stress. We also tested potential additive effects of RCA formation, large  
213 CCS and reduced CCFN, since the majority of benefits of RCA do not overlap with those of large  
214 CCS and reduced CCFN over time during growth. Benefits of both large CCS and reduced CCFN  
215 after RCA formation at 15 DAG were reduced. After 15 DAG, the majority of benefits were  
216 contributed by RCA. In this case, the combination of all three phenotypes at their most carbon-  
217 efficient level, i.e., the observed level that showed greatest reduction in the carbon cost of root  
218 maintenance, achieved growth benefits up to 135%, 132% or 161% under low nitrate, phosphorus  
219 or potassium availabilities.

220 We simulated the utility of CCS and CCFN under nitrogen and phosphorus deficiency with  
221 varied lateral root branching density (LRBD) in phenotypes with either the largest root cortical  
222 cells, or fewest root cortical cell files. Both large CCS and reduced CCFN achieved greater growth  
223 enhancements in phenotypes with half the reference LRBD under low soil nitrate availability. The  
224 contrary was evident for phenotypes grown under both low and medium soil phosphorus  
225 availability, where greater benefits were observed when plants with doubled LRBD compared to  
226 the reference phenotype. In soils with intermediate nitrate availability, phenotypes with normal  
227 LRBD had the greatest benefit compared to half or doubled LRBD (Fig. 8).

228 With greater carbon availability, simulated by increasing light utilization efficiency in the  
229 canopy module, the benefits of large CCS under low soil nitrogen or phosphorus  
230 availability declined (Fig. 9).

## 231 **Discussion**

232 Our results align with previous findings that RCA formation, which reduces the metabolic  
233 cost of soil exploration in terms of nutrient and C investment, improves plant growth under  
234 conditions of suboptimal availability of N, P and K (Postma and Lynch, 2011; Saengwilai et al.,  
235 2014; Galindo-Castañeda et al., 2019), and support the hypothesis that larger CCS and reduced  
236 CCFN increase soil nutrient acquisition by reducing root metabolic costs. The combined benefits  
237 of RCA formation, larger CCS and reduced CCFN for growth are greater than the benefit of RCA  
238 formation alone. Larger CCS and reduced CCFN reduce the metabolic cost of soil exploration  
239 under drought stress (Chimungu et al., 2014a, b), and are predicted by our results to alleviate  
240 nitrogen, phosphorus and potassium stress as well. No literature has reported CCS or CCFN

241 alleviating potassium stress. However, given that both larger CCS and reduced CCFN reduce root  
242 respiration (Chimungu et al., 2014a, b), we believe that they may have utility under potassium  
243 stress. These results indicate that all three phenes may have substantial utility on infertile soils,  
244 suggesting that cultivars with high RCA formation, large cortical cells and reduced cortical cell  
245 files would have reduced fertilizer requirements in intensive agriculture and would yield better in  
246 low-input systems. Our results focus on maize but we propose that they should be generally  
247 applicable to other grass species, which like most monocots lack secondary growth and so have a  
248 persistent cortex.

249 Typically, multiple edaphic stresses occur simultaneously (St. Clair and Lynch, 2010),  
250 although it is difficult to reflect concurrent stresses in the model because of potential interactions  
251 among plant stress responses (Dathe et al., 2013). In such environments, tradeoffs between nutrient  
252 acquisition strategies for specific nutrients, and between other plant physiological functions, are  
253 challenging (Hu et al., 2014; Lynch and St. Clair, 2004; Rubio et al., 2003). For example, the  
254 strategy of enhancing topsoil foraging proved to be critical for adaptations to low phosphorus soil  
255 in common bean (Lynch and Brown, 2001) and maize (Zhu et al., 2005); the “Steep, Cheap and  
256 Deep” ideotype proposes that root phenotypes capable of rapid exploration of deep soil strata would  
257 optimize soil nitrate and water capture in maize (Lynch, 2013). However, given the limited amount  
258 of carbon and nutrients available for root maintenance, extreme inclinations towards one strategy  
259 may be detrimental for the other, and optimization of resource allocation between deep soil  
260 exploration and topsoil exploration is critical. For example, the optimal lateral root branching  
261 density in maize is dependent upon nitrate and phosphorus availability (Postma et al., 2014). Sparse  
262 but long LRBD is optimal for nitrate uptake, while dense but short LRBD is optimal for phosphorus  
263 uptake. In another study (Dathe et al., 2016), axial root growth angle exhibit significant effects on  
264 nitrogen acquisition in maize, where extreme phenotypes have narrow intervals of optimal  
265 performances – extremely shallow root systems only increase N acquisition under reduced  
266 precipitation, while dimorphic phenotypes that combined shallow seminal roots with deep crown  
267 roots performed well in all environments. High LRBD introduces strong competition among roots  
268 for nitrate capture, therefore decreasing nitrate uptake since the carbon budget of the whole plant  
269 does not grant greater root length. Carbon budget and root competition does not impact phosphorus  
270 uptake as significantly as nitrate uptake, therefore increasing root length by increasing LRBD is  
271 optimal for phosphorus uptake. In reality, most genotypes have a balanced LRBD to meet the  
272 demand of both nitrate and phosphorus acquisition. Maize genotypes with high RCA formation  
273 could also inhibit radial phosphorus transport due to the reduction of living tissue (Hu et al., 2014).

274 The utilities of RCA, larger CCS and reduced CCFN were greater in plants that were  
275 experiencing moderate potassium stress (25% of potential growth) than in plants under severe  
276 potassium stress (less than 10% of potential growth). Similarly, RCA, larger CCS and reduced  
277 CCFN did not achieve optimal growth enhancement under extremely low soil nitrate and  
278 phosphorus availability (1% to 8% of potential growth under N stress, 1% to 5% of potential growth  
279 under P stress), but showed greater benefits under less severe stress. This decline is caused by  
280 reduction in the utility of the respiration reduction function. With extremely limited nutrient  
281 availability, root respiration per ion absorbed increases, inhibiting root and shoot growth to  
282 compensate for greater respiration. The reduction in respiration is more important in potassium  
283 deficient plants than in nitrogen deficient or phosphorus deficient plants, as carbon is relatively  
284 more limiting in potassium stressed plants, which differs from the cases of nitrogen and phosphorus  
285 (Postma and Lynch, 2011a). Substantial reductions in photosynthetic assimilation caused by  
286 nutrient deficiency impose carbon limitations under N, P or K stress. However, in potassium  
287 stressed plants, an adaptive response in carbon partitioning between roots and shoots is absent,

288 which is present in nitrogen or phosphorus stressed plants, that can allocate more carbon to root  
289 growth.

290 The model predicts a decline in the benefit of larger CCS and reduced CCFN at extremely  
291 low nutrient availability. If we consider the amount of nutrient required for the construction of a  
292 root segment as the cost, then the cost is greater in low nutrient soils than in fertile soils (Postma  
293 and Lynch, 2011b). Nutrient uptake under severe deficiency could be limited by both carbon and  
294 the deficient nutrient, while the cost of root tissue construction and respiration remain high, causing  
295 an increase in the cost-benefit ratio for nutrient uptake (Nielsen et al., 2001). In *OpenSimRoot*, the  
296 benefit of larger CCS and reduced CCFN is dependent on the cost – benefit ratio of root segments.  
297 Under extremely scarce nutrient availability, the decline in benefits is caused by the high cost –  
298 benefit ratio of root growth. Therefore, if nutrient availabilities fall below a threshold where the  
299 stressed plant does not have sufficient nutrient stores for tissue construction, causing extra  
300 allocation of carbon to the root system, thus deteriorating the photosynthetic and nutritional status  
301 of the plant, then the utility of RCA formation, CCS, CCFN, or other phenes that reduce metabolic  
302 costs, would decrease. In an extreme theoretical environment where all nutrients in soil are depleted,  
303 the utility of these phenes becomes nil.

304 While the potential for RCA formation is genetically controlled, RCA formation is highly  
305 responsive to edaphic stress (Fan et al., 2003). Substantial variation in CCS and CCFN, however,  
306 were observed among RILs in empirical studies, but were not as plastic to edaphic stress as RCA  
307 formation (Chimungu et al., 2014a, b), and could be beneficial starting at the very beginning of  
308 growth under edaphic stress. In our simulation, both large CCS and reduced CCFN exhibited  
309 benefits before the formation of RCA in response to nutrient limitation. As cortical cells and cell  
310 files were replaced by RCA formation, we expect the majority of benefits from these three phenes  
311 do not overlap over time. Therefore, we predict a simplification of the additive effects among the  
312 three phenes to be present under N, P or K stress, and observed increased benefits due to the  
313 combination of all three phene states compared to that of RCA formation alone. In reality, however,  
314 we expect a more complicated interaction between RCA formation, CCS and CCFN. RCA  
315 formation, as a response to nutrient stress, manifested 12-13 days after germination (Postma and  
316 Lynch, 2011). RCA formation in mid-root and apical regions were less than that of basal regions  
317 of a root (Fan et al., 2003). The variation in the spatial and temporal distribution of RCA at both  
318 the single root scale and the root system scale is dynamic (Burton et al., 2013), and such variation  
319 can cause changes in nitrogen uptake kinetics (York et al., 2016). Therefore, in reality, the  
320 interaction between RCA formation, CCS and CCFN could not be represented by a simplified  
321 expectation of additive effects.

322 Plants have developed multiple alternate strategies to increase nutrient uptake under severe  
323 nutrient stress, such as root hair formation, root exudation, and mycorrhizal colonization. Root hair  
324 formation has a relatively low cost – benefit ratio, but can increase phosphorus uptake significantly  
325 (Bates and Lynch, 2001; Nielsen et al., 1994, 2001; Zhu and Lynch, 2004; Miguel et al., 2015).  
326 Mycorrhizal colonization increased phosphorus efficiency significantly at low phosphorus  
327 availability compared to non-colonized plants (Ning and Cumming, 2001), but did not increase  
328 plant dry weight significantly due to the increased maintenance and growth respiration of the fungal  
329 tissue (Nielsen et al., 2001), indicating that root carbon costs are a major limitation to plant growth  
330 under phosphorus stress. Additionally, when the carbon cost of root growth is removed, simulated  
331 plant growth increased under P stress (Postma and Lynch, 2011). Our results support the general  
332 hypothesis that the metabolic costs of soil exploration in terms of the carbon and nutrient  
333 investment in root tissue over time becomes increasingly important as the availability of crucial  
334 soil resources declines.



335 Chimungu (2014) reported, in both drought-stressed and non-stressed plants, significantly  
336 thicker roots when larger cortical cells and more cortical cell files were present. In addition, Burton  
337 (2010) observed greater RCA formation in thicker root classes in non-stressed plants. The ability  
338 of roots to penetrate compacted soil and root depth are correlated to both root anatomical phenes  
339 such as RCA, CCS and CCFN, as well as root diameter, where deeper-rooting plants in compacted  
340 soil showed reduced CCFN and increased RCA formation. Additionally, root thickening in the  
341 form of root cortical area expansion were closely related to soil mechanical impedance in some  
342 genotypes (Chimungu et al., 2015b; Vanhees et al., 2020). Smaller outer band cortical cells could  
343 reduce the risk of root collapse when encountering increased mechanical impedance. RCA  
344 formation is also negatively correlated with root bending strength, while smaller distal root cortical  
345 cells, more cortical cells, and more CCFN increase the strength of root and reduce root collapsing  
346 during penetration of soil (Whiteley et al., 1982; Clark et al., 2003; Jin et al., 2013;) since they  
347 contribute to the construction of a thicker root. Root cortical cell diameter is a pivotal and heritable  
348 trait in determining the carbon cost of penetrating compacted soil, where large cell diameter  
349 correlated with reduced carbon cost of root growth, especially under high soil mechanical  
350 impedance; the plasticity of this trait allowed the enlargement of root cortical cells was a common  
351 response when roots encounter compacted soil (Colombi et al., 2019). These observations from  
352 empirical studies suggest that, although RCA formation, larger CCS and reduced CCFN reduce the  
353 metabolic cost of soil exploration, they may affect root penetration of hard soil domains, which  
354 could affect their ability to acquire resources located in deeper soil profiles.

355 An important merit of simulation modeling is the ability to test hypotheses and probe  
356 scenarios that are inaccessible to empirical studies. Simulation modeling makes it possible to isolate  
357 and test the objects of study, in this case, larger CCS and reduced CCFN, from interactions with  
358 many other biotic and abiotic factors, which is difficult to avoid in empirical studies (Dunbabin et  
359 al., 2013; Postma et al., 2014). It would be infeasible to test separately how larger CCS and reduced  
360 CCFN reduce respiration and nutrient content in an empirical study, while in modeling, different  
361 functions of specific phenes could be isolated and examined without being confounded by other  
362 functions, which was critical to several previous studies (Postma and Lynch, 2011a; 2011b). In  
363 other cases, modeling also allows us to study phenes that are otherwise difficult to manipulate in  
364 real plants, such as changing nutrient uptake kinetics (York et al., 2016), or examining root  
365 competition in time and space in the ‘three sisters’ polyculture (Postma et al., 2014) where  
366 empirical measurement is impractical. *In silico* approach allows the flexibility of conducting  
367 thousands of simulations in factorial designs (in this study, over 3,300 runs) which would be  
368 difficult to conduct empirically. Although such models are designed with assumptions and  
369 simplifications of the actual scenarios or mechanisms they simulate, and often (as in the present  
370 case) rely on empirical data as input parameters, it does not nullify the value of models as a useful  
371 research tool to provide a preliminary insight into root anatomy, architecture, physiological  
372 processes and interactions with other factors of interest, and a compliment to field studies even  
373 when empirical data are present. In our case, *OpenSimRoot* is capable of simulating a  
374 comprehensive range of phenes and phenotypes in specific environments that can be customized.  
375 Because of its heuristic nature, *OpenSimRoot* focuses on the validity of simulating physiological  
376 processes, rather than the alignment with empirical studies that predictive models emphasize.

377 Our results suggest potential areas where structural-functional plant models could be  
378 improved. The duration of simulation could be parameterized for longer periods, which could  
379 potentially enable models to simulate the full life cycle of plants, and demonstrate the dynamics of  
380 physiological processes. Interactions and dynamics among root phene states deserve more attention.  
381 Some other parameters, such as soil hardness, microbial associations, interplant competition  
382 (Postma and Lynch, 2011), and interspecific interactions in cropping systems (Postma and Lynch,

383 2012) are important for understanding ecosystem functioning on a greater scale, and may have  
384 consequences for the utility of root anatomical phenes such as RCA, CCS and CCFN. The phene  
385 aggregate of reduced CCFN and larger CCS, along with RCA formation, is defined as reduced  
386 living cortical area (LCA). Plants with reduced LCA had decreased root segment respiration,  
387 reduced P concentration in root tissues, and greater rooting depth, indicating lower carbon cost of  
388 root growth, which resulted in increased biomass and resource capture under P stress (Chimungu  
389 et al., 2014b; Galindo-Castañeda et al., 2019).

## 390 **Conclusions**

391 Quantitative evidence that larger CCS and reduced CCFN are adaptive phene states for  
392 multiple nutrient stresses are presented. The utilities of larger CCS and reduced CCFN in soils with  
393 suboptimal nitrogen, phosphorus and potassium availability are dependent on nutrient availability,  
394 phene functions, and interactions among phenes. We propose that larger CCS and reduced CCFN  
395 are complementary to RCA formation in terms of growth enhancements as the majority of benefits  
396 of these three phene states do not overlap in time. We expect tradeoffs for RCA formation, larger  
397 CCS and reduced CCFN to be present, as all three phene states are related to soil penetration and  
398 root proliferation. This aspect merits further investigation. Functional-structural plant models like  
399 *OpenSimRoot* can be used to simulate variations in these anatomical phenes and thereby evaluate  
400 their utilities under multiple edaphic stresses, and have the potential to provide a holistic  
401 understanding of the roles of root phenotypes for plant fitness. These results indicate that large CCS  
402 and reduced CCFN merit investigation as breeding targets for maize and possibly other cereal crops,  
403 since the development of crop cultivars with improved soil resource acquisition remains a critical  
404 strategy for improving the sustainability of intensive agriculture and for improving the productivity  
405 of low-input agroecosystems.

## 406 **Materials and Methods**

407 We used *OpenSimRoot* (Lynch et al., 1997), a functional-structural plant model with focus  
408 on root architecture and soil resource acquisition, to simulate the formation of RCA, variation in  
409 CCS and CCFN, and their physiological utility in maize growing with varied nitrate, phosphorus,  
410 or potassium availability in the soil. We also evaluated potential additive effects among RCA, CCS,  
411 and CCFN. In addition, we conducted a pair of two factor solution culture experiments to examine  
412 the variation in tissue N, P and K concentration in genotypes with contrast in CCS or CCFN.

### 413 *Solution culture study*

414 Four maize genotypes (IBM population IBM178, IBM201, IBM365, IBM30) were used in  
415 the solution culture study. Genotypes were selected for contrasting CCS (IBM365 and IBM30),  
416 and CCFN (IBM178 and IBM201) based on preliminary screening.

417 Genotypes were planted in four replications in total under both high and low N or K  
418 availabilities in solution culture, with sufficient P availability across all treatments in a greenhouse  
419 at the Penn State University campus located at University Park, PA, USA (40.8148° N, 77.8653°  
420 W), with two replications planted on June 4<sup>th</sup>, and two more replications planted on June 13<sup>th</sup>, 2017.  
421 Eight 100-liter non-transparent plexi glass solution culture tanks were used, within each tank, two  
422 replications of the four genotypes were planted. Nutrient solution was based on and modified upon  
423 the Hoagland solution (Johnson et al., 1957). N concentration in N stress treatments was 160umol/L,  
424 and K concentration in K stress treatments was 60 umol/L, P concentration was 2mmol/L.

425 Plants were grown for 24 days after transplanting, or 32 days after germination in growth  
426 chamber to avoid RCA formation confounding the effect of larger CCS and reduced CCFN. Upon  
427 harvest, 10 cm long root segments from base and tip of the second and the third whorl nodal roots  
428 were collected to conduct anatomical analysis and respiration measurements. The rest of the root  
429 system, along with leaves and stems, were separated and dried in oven at 60°C to measure root and  
430 shoot dry weight. Tissues were then ground and sent to the Agricultural Analytical Services  
431 Laboratory at the Penn State University for P and K content analysis. N content analysis was  
432 conducted with a 2400 CHNS/O Series II element analyzer (PerkinElmer). Nutrient content data  
433 was used to parameterize *OpenSimRoot* to include how tissue nutrient content was reduced by  
434 larger CCS and reduced CCFN in the simulations.

#### 435 *Model description*

436 *OpenSimRoot* simulates the three-dimensional root architecture and soil resource  
437 acquisition of a root system over time. The root system is described as distinct root classes  
438 represented by a growing number of root nodes and segments as the root system develops (Lynch  
439 et al. 1997). Root growth is based on a carbon source-sink model, where the carbon partition  
440 protocol has been described by Postma and Lynch (2011a). Shoot growth and photosynthesis is  
441 simulated using LINTUL (Spitters and Schapendonk, 1990). Nutrient uptake is simulated for each  
442 root segment in comparison with the optimal (o) and minimal (m) nutrient requirements of the plant.  
443 Nutrient deficiency, or stress factor, is defined as when nutrient uptake falls below the optimal  
444 nutrient requirement. The stress factor influences shoot development and photosynthetic efficiency  
445 depending on the nutrient simulated. We used the Barber-Cushman model (Itoh and Barber, 1983;  
446 Postma and Lynch, 2011a) to simulate phosphorus uptake, and linked *OpenSimRoot* to the three-  
447 dimensional hydrological model SWMS3D (Simunek et al., 1995) to simulate nitrate and potassium  
448 uptake. The Barber-Cushman model is considered to be inadequate for nitrate and potassium uptake  
449 as these nutrients are relatively mobile (Postma and Lynch, 2011b), and the Barber-Cushman model  
450 does not simulate leaching and ignores root competition in three dimensions. The SWMS3D model  
451 is not ideal for simulating the phosphorus depletion zones at root surface (Postma and Lynch,  
452 2011b), as computational demands required by the resulting substantial number of finite element  
453 (FEM) nodes (Hardelauf et al., 2007) are considerable, and the phosphorus depletion zone would  
454 be artificially enlarged in the SWMS3D model.

455 Variation in RCA formation, CCS and CCFN in maize are simulated for each root segment  
456 with empirical parameters retrieved from Burton (2010), and Chimungu (2014a, b). The percentage  
457 RCA for different root classes is well described by Fan et al. (2003). We simplified CCS and CCFN  
458 simulation by assuming they are uniformly distributed across root classes. The addition of CCS and  
459 CCFN were implemented as new model input files, no specific modification were made to the  
460 computational codes of OSR to accommodate this addition. RCA formation is allowed to combine  
461 nutrient remobilization and respiration reduction and is based on regression between the amount of  
462 RCA and nutrient content and root respiration of empirical measurements by Fan et al. (2003).  
463 *OpenSimRoot* does not explicitly represent root anatomy, so CCS and CCFN variation is  
464 represented by reducing modeled root respiration and tissue nutrient content.

#### 465 *Effects of nutrient stress on growth*

466 In *OpenSimRoot*, the nutrient stress factor module is implemented to affect the potential  
467 leaf area expansion rate and light use efficiency (LUE) independently as in the LINTUL model.  
468 The nutrient stress factor functions as a growth regulator between root and shoot growth. The  
469 nutrient stress factor negatively impacts light use efficiency and resulted in reduced carbon  
470 available for plant growth. Reduction in the potential leaf area expansion rate caused by the stress  
471 factor resulted in reduced sink strength of the shoot, and consequently greater allocation of carbon

472 to root growth. Nutrient-specific stress response was used to determine the effect of internal nutrient  
473 concentrations (nitrogen, potassium and phosphate) on the two parameters. In this study, potassium  
474 stress strongly reduces LUE (Zhao et al., 2001) but does not affect the potential leaf area expansion  
475 rate (Cakmak et al., 1994). Suboptimal phosphate strongly reduces the potential leaf area expansion  
476 rate but is trivial in affecting LUE (Lynch et al., 1991). Inorganic nitrogen strongly affects both  
477 parameters (Uhart and Andrade, 1995).

#### 478 *Distribution of RCA formation, CCS and CCFN within the root system*

479 We assumed that RCA formation starts behind the elongation zone of a root and develops  
480 over time until reaching a maximum. Therefore, the greatest amount of RCA formation can be  
481 found close to the base of a root, which aligns with Fan et al. (2003) but disagrees with Bouranis  
482 et al. (2006), Lenochová et al. (2009), and Burton (2010). RCA formation is reduced in the first 5  
483 cm of the root (Bouranis et al., 2006), which is a small part of the total root length and we expect  
484 the effect on total RCA formation to be small. We used the maximum amount of RCA formation  
485 in the literature, which is 39% of root cross-section area at 20 days after germination (Fan et al.,  
486 2003) in the model.

487 Variation in CCS and CCFN was observed in the mid cortical band of roots by Chimungu  
488 et al. (2014a, b). In reality, the spatial distribution of CCS and CCFN are not uniform in either the  
489 area cross-sectioned, or across different root classes. To demonstrate the effect of observed  
490 respiration reduction of these phenes, we assumed that CCS and CCFN variation are uniform  
491 regardless of root class and location in the area cross-sectioned. Parameterization of these phenes  
492 are based on the genotypic variation described by Chimungu et al. (2014a, b). CCS varies between  
493  $101 \mu\text{m}^2$  and  $533 \mu\text{m}^2$ , and CCFN varies between 8 and 17 in maize.

#### 494 *Interactions between RCA formation, LRBD, CCS and CCFN*

495 Living cortical area (LCA; Jaramillo et al., 2013) is proposed as a good predictor of root  
496 respiration, and a critical determinant of root metabolic cost, which involves the phenes in this  
497 study. Interactions between LCA components requires further demonstration. We simulated the  
498 extremes of variation in RCA formation, where RCA takes up between 0% to 39% of the root cross  
499 sectional area, CCS and CCFN to probe additive effects under low nitrogen and phosphorus  
500 availability. Significant genetic variation exists in lateral root branching density (LRBD) (Trachsel  
501 et al., 2011). We varied the LRBD parameter to the extremes reported in this study, between 4 to  
502 16 lateral roots/cm on axial roots, to examine if potential synergism between LRBD, CCS and  
503 CCFN under low soil nitrogen and phosphorus availability to further test the utility of CCS and  
504 CCFN in an integrated genotype.

#### 505 *System description, parameterization, and runs*

506 We simulated growth of 40 days after germination of a single maize plant, which represents  
507 a uniform monoculture plant community with a between-row spacing of 60 cm and a within row  
508 spacing of 26 cm. Aboveground competition was simulated by a shading function (Postma and  
509 Lynch, 2011). Parameterization was based on input parameters used in previous simulation studies  
510 with *OpenSimRoot* (Postma and Lynch, 2011a; 2011b). From empirical measurements from  
511 Chimungu *et al.* (2014a, b), we parameterized how larger CCS and reduced CCFN reduced root  
512 respiration. We parameterized how tissue nutrient content varied between contrasting phenotypes  
513 by conducting a solution culture study (see above). All simulations were performed on the Penn  
514 State supercomputing clusters aci-b, with the following variables: (1) CCS and CCFN; (2) the  
515 functions of RCA formation; (3) lateral root branching density with CCS and CCFN held constant;  
516 (4) atmospheric CO<sub>2</sub> pressure between ambient values of 400ppm, and up to four-fold (1600 ppm);  
517 (5) the availability of nitrate, phosphorus and potassium in the soil, from low to sufficient; and (6)

518 “max and min RCA”, “max and min CCS” and “max and min CCFN” reference genotypes. To  
519 account for stochasticity in growth rates and root branching frequencies, each scenario was  
520 simulated with four replications each with *OpenSimRoot*'s random number generator initialized to  
521 different values, with the graph showing the mean value. The variation of phenes in this study were  
522 based on empirical studies to avoid extrapolation towards unrealistic conditions. Appendix A  
523 contains a summary of the model parameterizations.

#### 524 *Statistical analysis*

525 Empirical data from the solution culture study were analyzed by paired Student's *t* tests in  
526 R 3.4.1 (R Core Team, 2017). We did not conduct significance test on the simulation results, as  
527 such tests were not reliable in simulation studies, as the ease of replication in computer simulations  
528 allows for any effect size to be found significant if there are enough replicates. Biological  
529 significance, rather than the statistical significance, should be the main focus of simulation  
530 experiments (White et al., 2014).

531

532

533 **Literature cited**

534

535 Bates, T. R., and Lynch, J. P. (2001). Root hairs confer a competitive advantage under low

536 phosphorus availability. *Plant and Soil*, 236(2), 243–250.

537 <https://doi.org/10.1023/A:1012791706800>

538 Bouranis, D. L., Chorianopoulou, S. N., Siyiannis, V. F., Protonotarios, V. E., and Hawkesford,

539 M. J. (2003). Aerenchyma formation in roots of maize during sulphate starvation. *Planta*,

540 217(3), 382–391. <https://doi.org/10.1007/s00425-003-1007-6>

541 Bouranis, Dimitris L., Chorianopoulou, S. N., Kollias, C., Maniou, P., Protonotarios, V. E.,

542 Siyiannis, V. F., and Hawkesford, M. J. (2006). Dynamics of Aerenchyma Distribution in

543 the Cortex of Sulfate-deprived Adventitious Roots of Maize. *Annals of Botany*, 97(5),

544 695–704. <https://doi.org/10.1093/aob/mcl024>

545 Burridge, J. D., Findeis, J. L., Jochua, C. N., Miguel, M. A., Mubichi-Kut, F. M., Quinhentos, M.

546 L., Xerinda, S. A., and Lynch, J. P. (2019). A case study on the efficacy of root

547 phenotypic selection for edaphic stress tolerance in low-input agriculture: Common

548 bean breeding in Mozambique. *Field Crops Research*, 244, 107612.

549 <https://doi.org/10.1016/j.fcr.2019.107612>

550 Burton, A. (2010) Phenotypic evaluation and genetic basis of anatomical and architectural root

551 traits in the genus *Zea*. PhD Thesis, Pennsylvania State University, USA.

552 Burton, A. L., Brown, K. M., and Lynch, J. P. (2013). Phenotypic Diversity of Root Anatomical

553 and Architectural Traits in *Zea* Species. *Crop Science*, 53(3), 1042–1055.

554 <https://doi.org/10.2135/cropsci2012.07.0440>

555 Cakmak, I., Hengeler, C., and Marschner, H. (1994). Partitioning of shoot and root dry matter and

556 carbohydrates in bean plants suffering from phosphorus, potassium and magnesium

- 557 deficiency. *Journal of Experimental Botany*, 45(9), 1245–1250.  
558 <https://doi.org/10.1093/jxb/45.9.1245>
- 559 Chimungu, J. G., Brown, K. M., and Lynch, J. P. (2014a). Large Root Cortical Cell Size  
560 Improves Drought Tolerance in Maize. *Plant Physiology*, 166(4), 2166–2178.  
561 <https://doi.org/10.1104/pp.114.250449>
- 562 Chimungu, J. G., Brown, K. M., and Lynch, J. P. (2014b). Reduced Root Cortical Cell File  
563 Number Improves Drought Tolerance in Maize. *Plant Physiology*, 166(4), 1943–1955.  
564 <https://doi.org/10.1104/pp.114.249037>
- 565 Chimungu, J. G., Loades, K. W., and Lynch, J. P. (2015). Root anatomical phenes predict root  
566 penetration ability and biomechanical properties in maize (*Zea Mays*). *Journal of*  
567 *Experimental Botany*, 66(11), 3151–3162. <https://doi.org/10.1093/jxb/erv121>
- 568 Chimungu, J. G., Maliro, M. F. A., Nalivata, P. C., Kanyama-Phiri, G., Brown, K. M., and Lynch,  
569 J. P. (2015). Utility of root cortical aerenchyma under water limited conditions in tropical  
570 maize (*Zea mays* L.). *Field Crops Research*, 171, 86–98.  
571 <https://doi.org/10.1016/j.fcr.2014.10.009>
- 572 Colombi, T., Herrmann, A. M., Vallenback, P., and Keller, T. (2019). Cortical Cell Diameter Is  
573 Key To Energy Costs of Root Growth in Wheat. *Plant Physiology*, 180(4), 2049–2060.  
574 <https://doi.org/10.1104/pp.19.00262>
- 575 Clark, L. J., Whalley, W. R., and Barraclough, P. B. (2003). *How do roots penetrate strong soil?*  
576 12.
- 577 Dathe, A., Postma, J. A., and Lynch, J. P. (2013). Modeling Resource Interactions Under  
578 Multiple Edaphic Stresses. In D. Timlin and L. R. Ahuja (Eds.), *Advances in Agricultural*  
579 *Systems Modeling* (pp. 273–294). American Society of Agronomy and Soil Science  
580 Society of America. <https://doi.org/10.2134/advagricsystmodel4.c12>

- 581 Dathe, A., Postma, J. A., Postma-Blaauw, M. B., & Lynch, J. P. (2016). Impact of axial root  
582 growth angles on nitrogen acquisition in maize depends on environmental conditions.  
583 *Annals of Botany*, 118(3), 401–414. <https://doi.org/10.1093/aob/mcw112>
- 584 Drew, M. C., He, C.-J., and Morgan, P. W. (1989). Decreased Ethylene Biosynthesis, and  
585 Induction of Aerenchyma, by Nitrogen- or Phosphate-Starvation in Adventitious Roots of  
586 *Zea mays* L. *Plant Physiology*, 91(1), 266–271. <https://doi.org/10.1104/pp.91.1.266>
- 587 Dunbabin, V. M., Postma, J. A., Schnepf, A., Pagès, L., Javaux, M., Wu, L., Leitner, D., Chen, Y.  
588 L., Rengel, Z., and Diggle, A. J. (2013). Modelling root–soil interactions using three–  
589 dimensional models of root growth, architecture and function. *Plant and Soil*, 372(1–2),  
590 93–124. <https://doi.org/10.1007/s11104-013-1769-y>
- 591 Evans, D. E. (2003). Aerenchyma formation: Tansley review. *New Phytologist*, 161(1), 35–49.  
592 <https://doi.org/10.1046/j.1469-8137.2003.00907.x>
- 593 Fan, M., Zhu, J., Richards, C., Brown, K. M., and Lynch, J. P. (2003). Physiological roles for  
594 aerenchyma in phosphorus-stressed roots. *Functional Plant Biology*, 30(5), 493.  
595 <https://doi.org/10.1071/FP03046>
- 596 Galindo-Castañeda, T., Brown, K. M., Kuldau, G. A., Roth, G. W., Wenner, N. G., Ray, S.,  
597 Schneider, H., and Lynch, J. P. (2019). Root cortical anatomy is associated with  
598 differential pathogenic and symbiotic fungal colonization in maize. *Plant, Cell and*  
599 *Environment*, 42(11), 2999–3014. <https://doi.org/10.1111/pce.13615>
- 600 Hardelauf, H., Javaux, M., Herbst, M., Gottschalk, S., Kasteel, R., Vanderborght, J., and  
601 Vereecken, H. (2007). PARSWMS: A Parallelized Model for Simulating Three-  
602 Dimensional Water Flow and Solute Transport in Variably Saturated Soils. *Vadose Zone*  
603 *Journal*, 6(2), 255–259. <https://doi.org/10.2136/vzj2006.0156>



- 604 Ho, M. D., McCannon, B. C., and Lynch, J. P. (2004). Optimization modeling of plant root  
605 architecture for water and phosphorus acquisition. *Journal of Theoretical Biology*,  
606 226(3), 331–340. <https://doi.org/10.1016/j.jtbi.2003.09.011>
- 607 Ho, M. D., Rosas, J. C., Brown, K. M., and Lynch, J. P. (2005). Root architectural tradeoffs for  
608 water and phosphorus acquisition. *Functional Plant Biology*, 32(8), 737.  
609 <https://doi.org/10.1071/FP05043>
- 610 Hu, B., Henry, A., Brown, K. M., and Lynch, J. P. (2014). Root cortical aerenchyma inhibits  
611 radial nutrient transport in maize (*Zea mays*). *Annals of Botany*, 113(1), 181–189.  
612 <https://doi.org/10.1093/aob/mct259>
- 613 Itoh, S., and Barber, S. A. (1983). A numerical solution of whole plant nutrient uptake for soil-  
614 root systems with root hairs. *Plant and Soil*, 70(3), 403–413.  
615 <https://doi.org/10.1007/BF02374895>
- 616 Jackson, M. B., and Armstrong, W. (1999). Formation of Aerenchyma and the Processes of Plant  
617 Ventilation in Relation to Soil Flooding and Submergence. *Plant Biology*, 1(3), 274–287.  
618 <https://doi.org/10.1111/j.1438-8677.1999.tb00253.x>
- 619 Jaramillo, R. E., Nord, E. A., Chimungu, J. G., Brown, K. M., and Lynch, J. P. (2013). Root  
620 cortical burden influences drought tolerance in maize. *Annals of Botany*, 112(2), 429–  
621 437. <https://doi.org/10.1093/aob/mct069>
- 622 Jia X, Liu P, Lynch JP. 2018. Greater lateral root branching density in maize (*Zea mays* L.)  
623 improves phosphorus acquisition from low phosphorus soil. *Journal of Experimental*  
624 *Botany* 69: 4961–4970.
- 625 Jin, K., Shen, J., Ashton, R. W., Dodd, I. C., Parry, M. A. J., and Whalley, W. R. (2013). How do  
626 roots elongate in a structured soil? *Journal of Experimental Botany*, 64(15), 4761–4777.  
627 <https://doi.org/10.1093/jxb/ert286>

- 628 Johnson, C. M., Stout, P. R., Broyer, T. C., and Carlton, A. B. (1957). Comparative chlorine  
629 requirements of different plant species. *Plant and Soil*, 8(4), 337–353.  
630 <https://doi.org/10.1007/BF01666323>
- 631 Koevoets, I. T., Venema, J. H., Elzenga, J. Theo. M., and Testerink, C. (2016). Roots  
632 Withstanding their Environment: Exploiting Root System Architecture Responses to  
633 Abiotic Stress to Improve Crop Tolerance. *Frontiers in Plant Science*, 07.  
634 <https://doi.org/10.3389/fpls.2016.01335>
- 635 Konings, H., and Verschuren, G. (1980). Formation of aerenchyma in roots of *Zea mays* in  
636 aerated solutions, and its relation to nutrient supply. *Physiologia Plantarum*, 49(3), 265–  
637 270. <https://doi.org/10.1111/j.1399-3054.1980.tb02661.x>
- 638 Lambers, H., and Oliveira, R. S. (2020). *Plant Physiological Ecology*. Springer.  
639 <https://public.ebookcentral.proquest.com/choice/publicfullrecord.aspx?p=5996299>
- 640 Lambers, H., Raven, J., Shaver, G., and Smith, S. (2008). Plant nutrient-acquisition strategies  
641 change with soil age. *Trends in Ecology and Evolution*, 23(2), 95–103.  
642 <https://doi.org/10.1016/j.tree.2007.10.008>
- 643 Lenochová, Z., Soukup, A., and Votrubová, O. (2009). Aerenchyma formation in maize roots.  
644 *Biologia Plantarum*, 53(2), 263–270. <https://doi.org/10.1007/s10535-009-0049-4>
- 645 Liao, H., Rubio, G., Yan, X., Cao, A., Brown, K. M., and Lynch, J. P. (2002). Effect of  
646 phosphorus availability on basal root shallowness in common bean. In D. S. Powlson, G.  
647 L. Bateman, K. G. Davies, J. L. Gaunt, and P. R. Hirsch (Eds.), *Interactions in the Root*  
648 *Environment: An Integrated Approach* (pp. 69–79). Springer Netherlands.  
649 [https://doi.org/10.1007/978-94-010-0566-1\\_7](https://doi.org/10.1007/978-94-010-0566-1_7)
- 650 Lynch, J., Läuchli, A., and Epstein, E. (1991). Vegetative Growth of the Common Bean in  
651 Response to Phosphorus Nutrition. *Crop Science*, 31(2), 380–387.  
652 <https://doi.org/10.2135/cropsci1991.0011183X003100020031x>

- 653 Lynch, J. P. (2011). Root Phenes for Enhanced Soil Exploration and Phosphorus Acquisition:  
654 Tools for Future Crops. *Plant Physiology*, 156(3), 1041–1049.  
655 <https://doi.org/10.1104/pp.111.175414>
- 656 Lynch, J. P. (2013). Steep, cheap and deep: An ideotype to optimize water and N acquisition by  
657 maize root systems. *Annals of Botany*, 112(2), 347–357.  
658 <https://doi.org/10.1093/aob/mcs293>
- 659 Lynch, J. P. (2015). Root phenes that reduce the metabolic costs of soil exploration:  
660 Opportunities for 21st century agriculture: New roots for agriculture. *Plant, Cell and*  
661 *Environment*, 38(9), 1775–1784. <https://doi.org/10.1111/pce.12451>
- 662 Lynch, J. P. (2019). Root phenotypes for improved nutrient capture: An underexploited  
663 opportunity for global agriculture. *New Phytologist*, 223(2), 548–564.  
664 <https://doi.org/10.1111/nph.15738>
- 665 Lynch, J. P., and Brown, K. M. (2001). *Topsoil foraging – an architectural adaptation of plants*  
666 *to low phosphorus availability*. 13.
- 667 Lynch, J. P., Nielsen, K. L., Davis, R. D., and JablOKow, A. G. (1997). *SimRoot: Modelling and*  
668 *visualization of root systems*. 14.
- 669 Lynch, J. P., and St.Clair, S. B. (2004). Mineral stress: The missing link in understanding how  
670 global climate change will affect plants in real world soils. *Field Crops Research*, 90(1),  
671 101–115. <https://doi.org/10.1016/j.fcr.2004.07.008>
- 672 Mano, Y., Omori, F., Takamizo, T., Kindiger, B., Bird, R. McK., and Loaisiga, C. H. (2006).  
673 Variation for Root Aerenchyma Formation in Flooded and Non-Flooded Maize and  
674 Teosinte Seedlings. *Plant and Soil*, 281(1–2), 269–279. [https://doi.org/10.1007/s11104-](https://doi.org/10.1007/s11104-005-4268-y)  
675 [005-4268-y](https://doi.org/10.1007/s11104-005-4268-y)

- 676 Miguel, M. A., Postma, J. A., and Lynch, J. P. (2015). Phene Synergism between Root Hair  
677 Length and Basal Root Growth Angle for Phosphorus Acquisition. *Plant Physiology*,  
678 *167*(4), 1430–1439. <https://doi.org/10.1104/pp.15.00145>
- 679 Miller, C. R., Ochoa, I., Nielsen, K. L., Beck, D., and Lynch, J. P. (2003). Genetic variation for  
680 adventitious rooting in response to low phosphorus availability: Potential utility for  
681 phosphorus acquisition from stratified soils. *Functional Plant Biology*, *30*(9), 973.  
682 <https://doi.org/10.1071/FP03078>
- 683 Nielsen, K. L., Eshel, A., and Lynch, J. P. (2001). *The effect of phosphorus availability on the*  
684 *carbon economy of contrasting common bean (Phaseolus vulgaris L.) genotypes*. 11.
- 685 Nielsen, K. L., Lynch, J. P., Jablokow, A. G., and Curtis, P. S. (1994). Carbon cost of root  
686 systems: An architectural approach. *Plant and Soil*, *165*(1), 161–169.  
687 <https://doi.org/10.1007/BF00009972>
- 688 Ning, J., and Cumming, J. R. (2001). Arbuscular mycorrhizal fungi alter phosphorus relations of  
689 broomsedge (*Andropogon virginicus* L.) plants. *Journal of Experimental Botany*,  
690 *52*(362), 1883–1891. <https://doi.org/10.1093/jexbot/52.362.1883>
- 691 Pieruschka, R., and Poorter, H. (2012). Phenotyping plants: Genes, phenes and machines.  
692 *Functional Plant Biology*, *39*(11), 813. [https://doi.org/10.1071/FPv39n11\\_IN](https://doi.org/10.1071/FPv39n11_IN)
- 693 Postma, Johannes A., and Lynch, J. P. (2011a). Theoretical evidence for the functional benefit of  
694 root cortical aerenchyma in soils with low phosphorus availability. *Annals of Botany*,  
695 *107*(5), 829–841. <https://doi.org/10.1093/aob/mcq199>
- 696 Postma, Johannes Auke, and Lynch, J. P. (2011b). Root Cortical Aerenchyma Enhances the  
697 Growth of Maize on Soils with Suboptimal Availability of Nitrogen, Phosphorus, and  
698 Potassium. *Plant Physiology*, *156*(3), 1190–1201. <https://doi.org/10.1104/pp.111.175489>

- 699 Postma, Johannes A., and Lynch, J. P. (2012). Complementarity in root architecture for nutrient  
700 uptake in ancient maize/bean and maize/bean/squash polycultures. *Annals of Botany*,  
701 *110*(2), 521–534. <https://doi.org/10.1093/aob/mcs082>
- 702 Postma, Johannes A., Schurr, U., and Fiorani, F. (2014). Dynamic root growth and architecture  
703 responses to limiting nutrient availability: Linking physiological models and  
704 experimentation. *Biotechnology Advances*, *32*(1), 53–65.  
705 <https://doi.org/10.1016/j.biotechadv.2013.08.019>
- 706 Rangarajan H, Postma J, Lynch JP. (2018). Co-optimization of axial root phenotypes for nitrogen  
707 and phosphorus acquisition in common bean. *Annals of Botany* *122*: 485–499.
- 708 Richardson, A. E., Lynch, J. P., Ryan, P. R., Delhaize, E., Smith, F. A., Smith, S. E., Harvey, P.  
709 R., Ryan, M. H., Veneklaas, E. J., Lambers, H., Oberson, A., Culvenor, R. A., and  
710 Simpson, R. J. (2011). Plant and microbial strategies to improve the phosphorus  
711 efficiency of agriculture. *Plant and Soil*, *349*(1–2), 121–156.  
712 <https://doi.org/10.1007/s11104-011-0950-4>
- 713 Rubio, G., Liao, H., Yan, X., and Lynch, J. P. (2003). Topsoil Foraging and Its Role in Plant  
714 Competitiveness for Phosphorus in Common Bean. *Crop Science*, *43*(2), 598.  
715 <https://doi.org/10.2135/cropsci2003.0598>
- 716 Sablowski, R., and Carnier Dornelas, M. (2014). Interplay between cell growth and cell cycle in  
717 plants. *Journal of Experimental Botany*, *65*(10), 2703–2714.  
718 <https://doi.org/10.1093/jxb/ert354>
- 719 Saengwilai, P., Nord, E. A., Chimungu, J. G., Brown, K. M., and Lynch, J. P. (2014). Root  
720 Cortical Aerenchyma Enhances Nitrogen Acquisition from Low-Nitrogen Soils in Maize.  
721 *PLANT PHYSIOLOGY*, *166*(2), 726–735. <https://doi.org/10.1104/pp.114.241711>
- 722 Simunek, J., Huang, K., and van Genuchten, M. (1995). *The SWMS3D Code for Simulating Water*  
723 *Flow and Solute Transport in Three-Dimensional Variably-Saturated Media*.

- 724 Spitters, C. J. T., and Schapendonk, A. H. C. M. (1990). Evaluation of breeding strategies for  
725 drought tolerance in potato by means of crop growth simulation. *Plant and Soil*, 123(2),  
726 193–203. <https://doi.org/10.1007/BF00011268>
- 727 St.Clair, S. B., and Lynch, J. P. (2010). The opening of Pandora’s Box: Climate change impacts  
728 on soil fertility and crop nutrition in developing countries. *Plant and Soil*, 335(1–2), 101–  
729 115. <https://doi.org/10.1007/s11104-010-0328-z>
- 730 Trachsel, S., Kaeppler, S. M., Brown, K. M., and Lynch, J. P. (2011). Shovelomics: High  
731 throughput phenotyping of maize (*Zea mays* L.) root architecture in the field. *Plant and*  
732 *Soil*, 341(1–2), 75–87. <https://doi.org/10.1007/s11104-010-0623-8>
- 733 Uhart, S. A., and Andrade, F. H. (1995). Nitrogen Defeciency in Maize: I. Effects on Crop  
734 Growth, Development, Dry Matter Partitioning, and Kernel Set. *Crop Science*, 35(5),  
735 1376–1383. <https://doi.org/10.2135/cropsci1995.0011183X003500050020x>
- 736 Vanhees, D.J., Loades, K.W., Bengough, A.G., Mooney, S. J., and Lynch, J. P. (2020). Root  
737 anatomical traits contribute to deeper rooting of maize under compacted field conditions.  
738 *Journal of Experimental Botany*. <https://doi.org/10.1093/jxb/eraa165>
- 739 Walk, T.C., Jaramillo, R., Lynch, J. P. (2006). Architectural tradeoffs between adventitious and  
740 basal roots for phosphorus acquisition. *Plant and Soil* 279: 347–366.
- 741 Wang, X., Yan, X., and Liao, H. (2010). Genetic improvement for phosphorus efficiency in  
742 soybean: A radical approach. *Annals of Botany*, 106(1), 215–222.  
743 <https://doi.org/10.1093/aob/mcq029>
- 744 White, J. W., Rassweiler, A., Samhour, J. F., Stier, A. C., and White, C. (2014). Ecologists  
745 should not use statistical significance tests to interpret simulation model results. *Oikos*,  
746 123(4), 385–388. <https://doi.org/10.1111/j.1600-0706.2013.01073.x>
- 747 Whiteley, G. M., Hewitt, J. S., and Dexter, A. R. (1982). The buckling of plant roots. *Physiologia*  
748 *Plantarum*, 54(3), 333–342. <https://doi.org/10.1111/j.1399-3054.1982.tb00268.x>

- 749 York, L. M., and Lynch, J. P. (2015). Intensive field phenotyping of maize (*Zea mays* L.) root  
750 crowns identifies phenes and phene integration associated with plant growth and nitrogen  
751 acquisition. *Journal of Experimental Botany*, 66(18), 5493–5505.  
752 <https://doi.org/10.1093/jxb/erv241>
- 753 York, L. M., Nord, E. A., and Lynch, J. P. (2013). Integration of root phenes for soil resource  
754 acquisition. *Frontiers in Plant Science*, 4. <https://doi.org/10.3389/fpls.2013.00355>
- 755 York, L. M., Silberbush, M., and Lynch, J. P. (2016). Spatiotemporal variation of nitrate uptake  
756 kinetics within the maize (*Zea mays* L.) root system is associated with greater nitrate  
757 uptake and interactions with architectural phenes. *Journal of Experimental Botany*,  
758 67(12), 3763–3775. <https://doi.org/10.1093/jxb/erw133>
- 759 Zhao, D., Oosterhuis, D. M., and Bednarz, C. W. (2001). Influence of Potassium Deficiency on  
760 Photosynthesis, Chlorophyll Content, and Chloroplast Ultrastructure of Cotton Plants.  
761 *Photosynthetica*, 39(1), 103–109. <https://doi.org/10.1023/A:1012404204910>
- 762 Zhu, J., Brown, K. M., and Lynch, J. P. (2010a). Root cortical aerenchyma improves the drought  
763 tolerance of maize (*Zea mays* L.). *Plant, Cell and Environment*.  
764 <https://doi.org/10.1111/j.1365-3040.2009.02099.x>
- 765 Zhu, J., Zhang, C., Lynch, J. P. (2010b). The utility of phenotypic plasticity of root hair length for  
766 phosphorus acquisition. *Functional Plant Biology* 37: 313–322.
- 767 Zhu, J., Kaeppler, S. M., and Lynch, J. P. (2005). Topsoil foraging and phosphorus acquisition  
768 efficiency in maize (*Zea mays*). *Functional Plant Biology*, 32(8), 749.  
769 <https://doi.org/10.1071/FP05005>
- 770 Zhu, J., and Lynch, J. P. (2004). The contribution of lateral rooting to phosphorus acquisition  
771 efficiency in maize (*Zea mays*) seedlings. *Functional Plant Biology*, 31(10), 949.  
772 <https://doi.org/10.1071/FP04046>
- 773

774 **Figures**

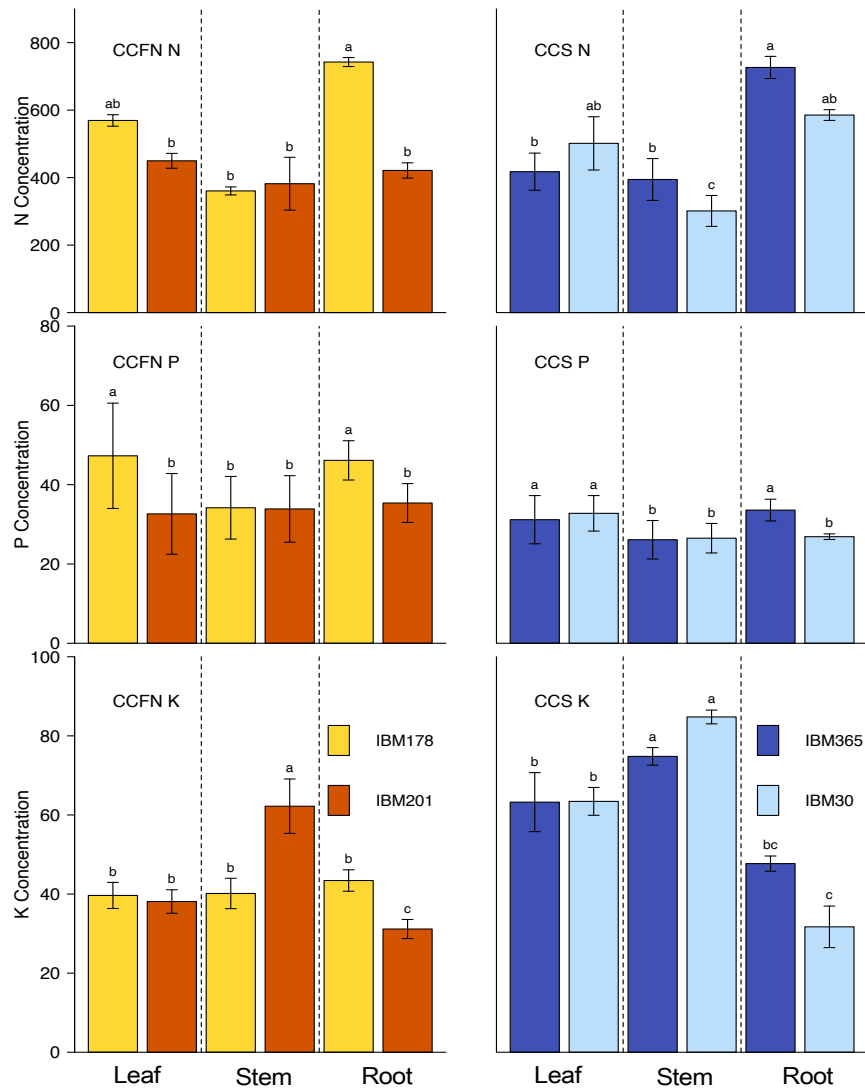

792 Figure 1. Variation in tissue nutrient concentration among maize genotypes contrasting in CCFN  
 793 and CCS. Unit of tissue nutrient concentration is  $\mu\text{mol/g}$  dry weight. IBM178 is a many CCFN  
 794 genotype, IBM201 is a reduced CCFN genotype, IBM365 is a small CCS genotype, IBM30 is a  
 795 larger CCS genotype. In the nutrient solution, N concentration is  $160 \mu\text{mol/L}$ , and K concentration  
 796 is  $60 \mu\text{mol/L}$  under N or K stress respectively. P concentration is  $360 \mu\text{mol/L}$ . Error bars represent  
 797 standard deviation of measurements from four replications.

798  
 799  
 800  
 801  
 802



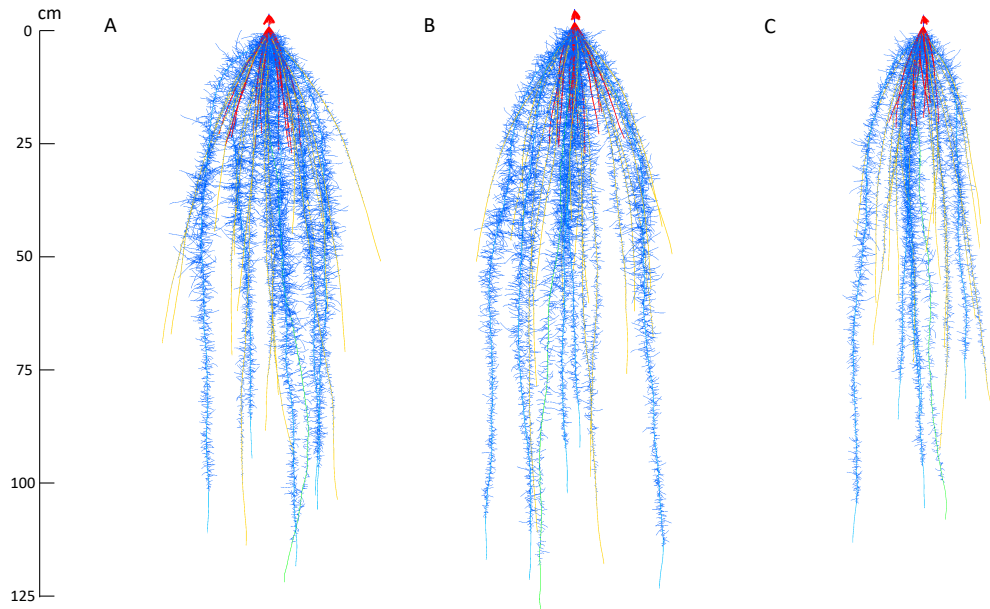

803

804

805

806

807 Figure 2. Visualized output of the simulated growth of maize root systems at 42 D.A.G. Plant growth was  
808 simulated under moderate N stress (42 kg/ha). Plant A represents a few CCFN genotype (8 cortical cell files),  
809 plant B represents a large CCS genotype (533 microns), and plant C represents a reference genotype with  
810 increased CCFN (17 cortical cell files) and reduced CCS (101 microns). The axis represents the rooting depth  
811 of the three plants in centimeters.

812

813

814

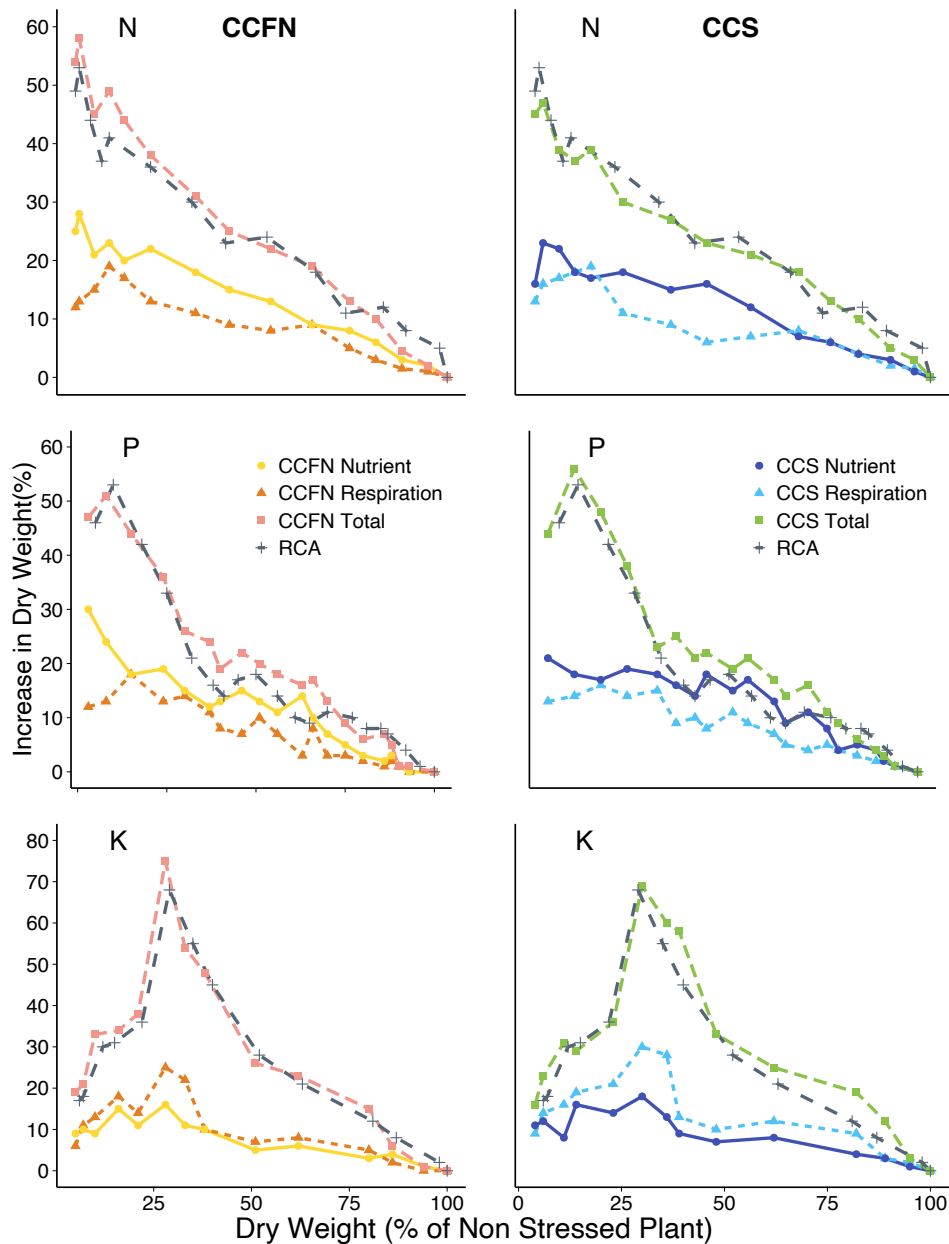

831 Figure 3. The benefits of RCA formation, larger CCS and small CCFN under suboptimal  
 832 availability of N, P and K. Stresses are expressed as the relative plant dry weight at 40 days after  
 833 germination compared to a non-stressed reference plant on the x axis. Benefits are expressed as  
 834 increase in plant dry weight due to the presence of the phenes compared to a reference  
 835 phenotype. The phenes were at the maximum beneficial level, i.e., maximum RCA formation,  
 836 largest cortical cells and least cortical cell files simulated independently.

837

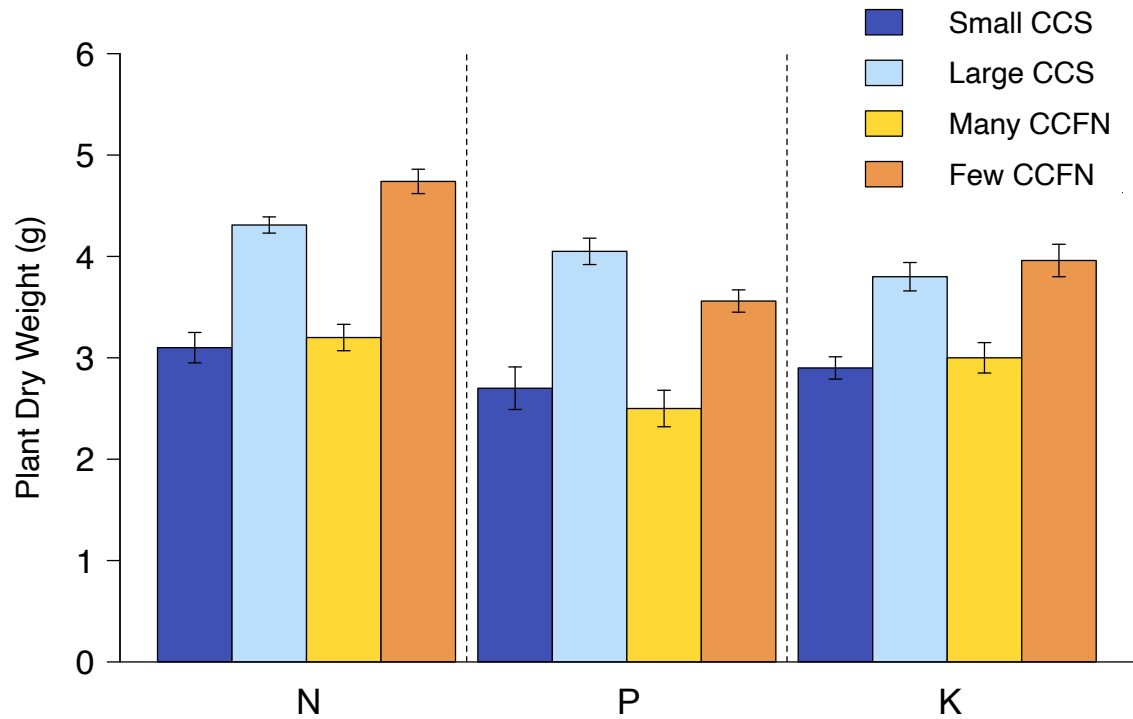

838

839 Figure 4. Total plant dry weight showing the utility of larger CCS ( $533 \mu\text{m}^2$ ) and reduced CCFN  
840 (8 cell files) vs the reference phenotype ( $101 \mu\text{m}^2$  CCS and 17 CCFN) under N, P and K stress  
841 (plant dry weight 10% of unstressed) at 40 days after germination. Error bars represent standard  
842 deviation in four repeated runs. Variation was caused by stochasticity in modeled root growth rate,  
843 root branching frequency, and root growth angle.

844

845

846

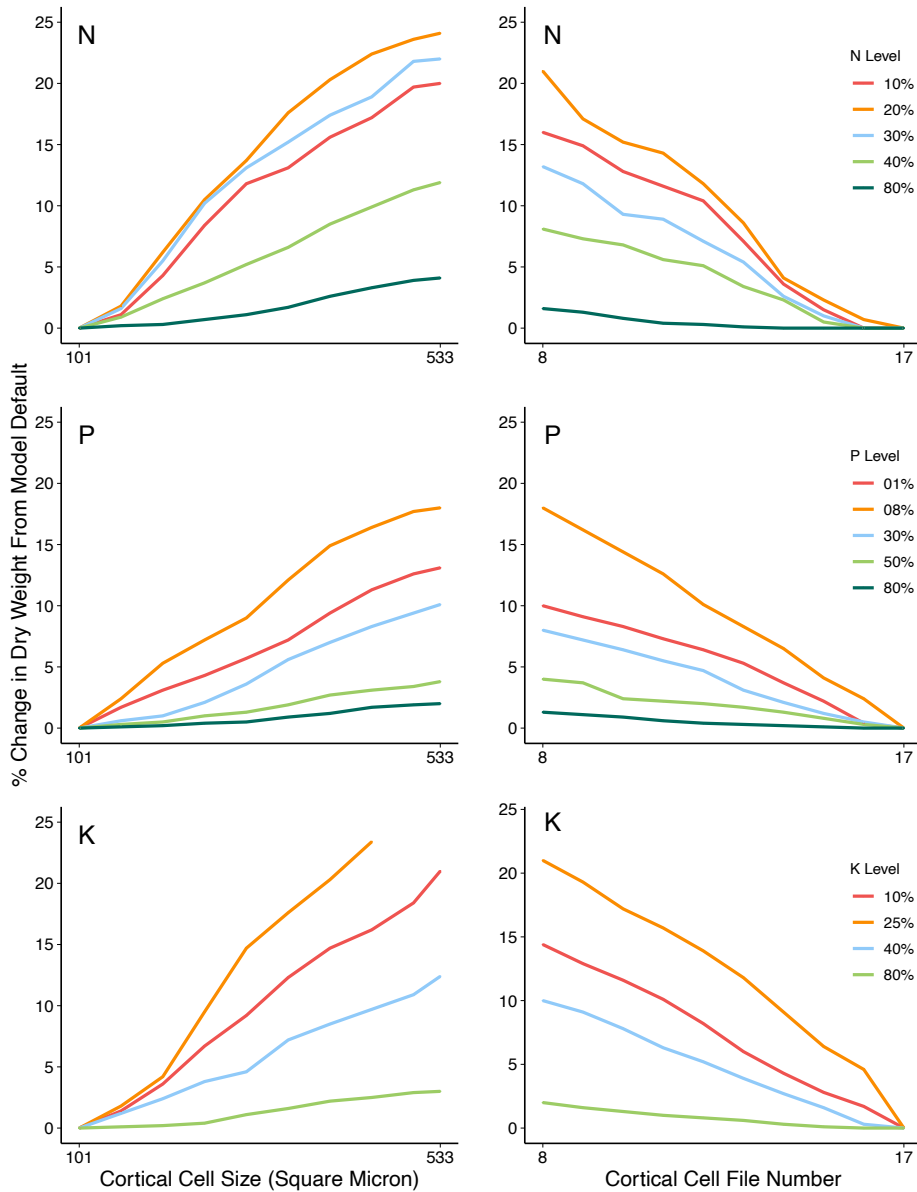

847  
848

849 Figure 5. Sensitivity analysis of CCS and CCFN variation on benefits introduced by reducing  
850 respiration. Different lines correspond with percent sufficient soil nutrient availabilities as indicated.  
851 Cortical cell size and cell file number values used for simulations were based on empirical data  
852 from the literature and were within the range observed empirically. Benefits are expressed as  
853 increase in plant dry weight due to the presence of the phene states compared to the model default  
854 phenotype. N level (10% = 21 kg/ha, 20% = 42 kg/ha, 30% = 63 kg/ha, 40% = 84 kg/ha, 80% =  
855 168 kg/ha), P level (01% = 0.05 kg/ha, 08% = 0.4 kg/ha, 30% = 1.5 kg/ha, 50% = 2.5 kg/ha, 80% =  
856 4 kg/ha), K level (10% = 0.5 kg/ha, 25% = 1.2 kg/ha, 40% = 1.9 kg/ha, 80% = 3.8 kg/ha).

857

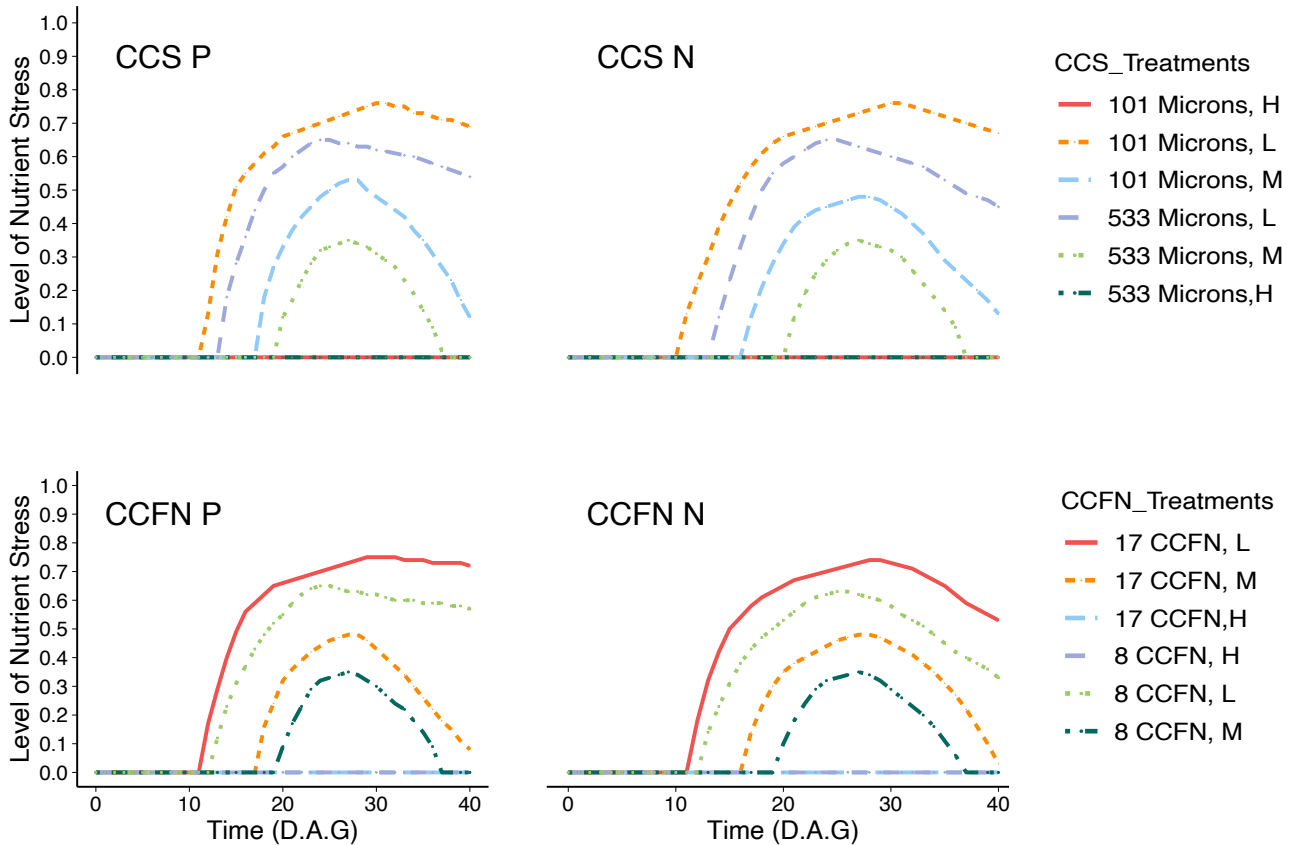

858

859 Figure 6. Nitrogen and phosphorus stress as affected by contrasting CCS and CCFN on a scale from  
 860 0-1. Stress is calculated as  $1 - (\mu - m)/(o - m)$ , where  $\mu$  is the amount of nitrate or phosphorus  
 861 being uptaken,  $o$  is the optimal nitrate or phosphorus content in the plant, and  $m$  is the minimal  
 862 nitrate or phosphorus content in the plant. 0 indicates no stress, 1 indicates the most severe stress.  
 863 HN = 210 kg/ha, MN = 84 kg/ha, LN = 21kg/ha, HP = 5kg/ha, MP = 2kg/ha, LP = 0.5kg/ha.

864

865

866

867

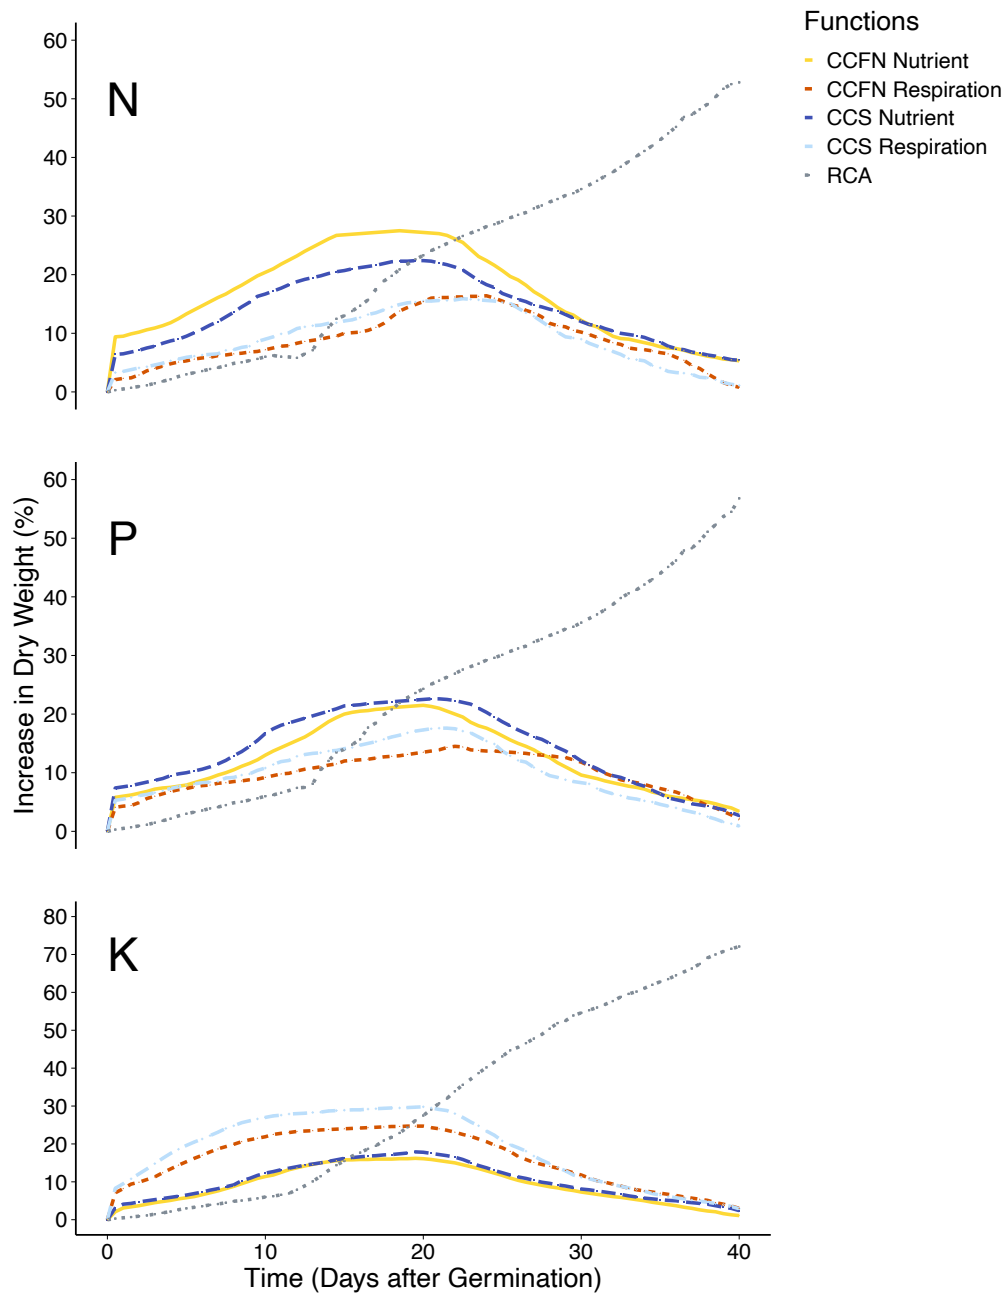

868  
869

870 Figure 7. Relative benefit of having RCA formation, larger CCS and small CCFN simultaneously  
871 in a simulated plant over time at 42 kg/ha of soil nitrate, 0.5 kg/ha of soil phosphorus and 1.5kg/ha  
872 of soil potassium availability. Different lines correspond to relative benefits for respiration and  
873 nutrient content, similarly described in figure 2. The gray line indicates the hypothetical additive  
874 benefit when RCA formation achieves the optimal growth enhancement

875

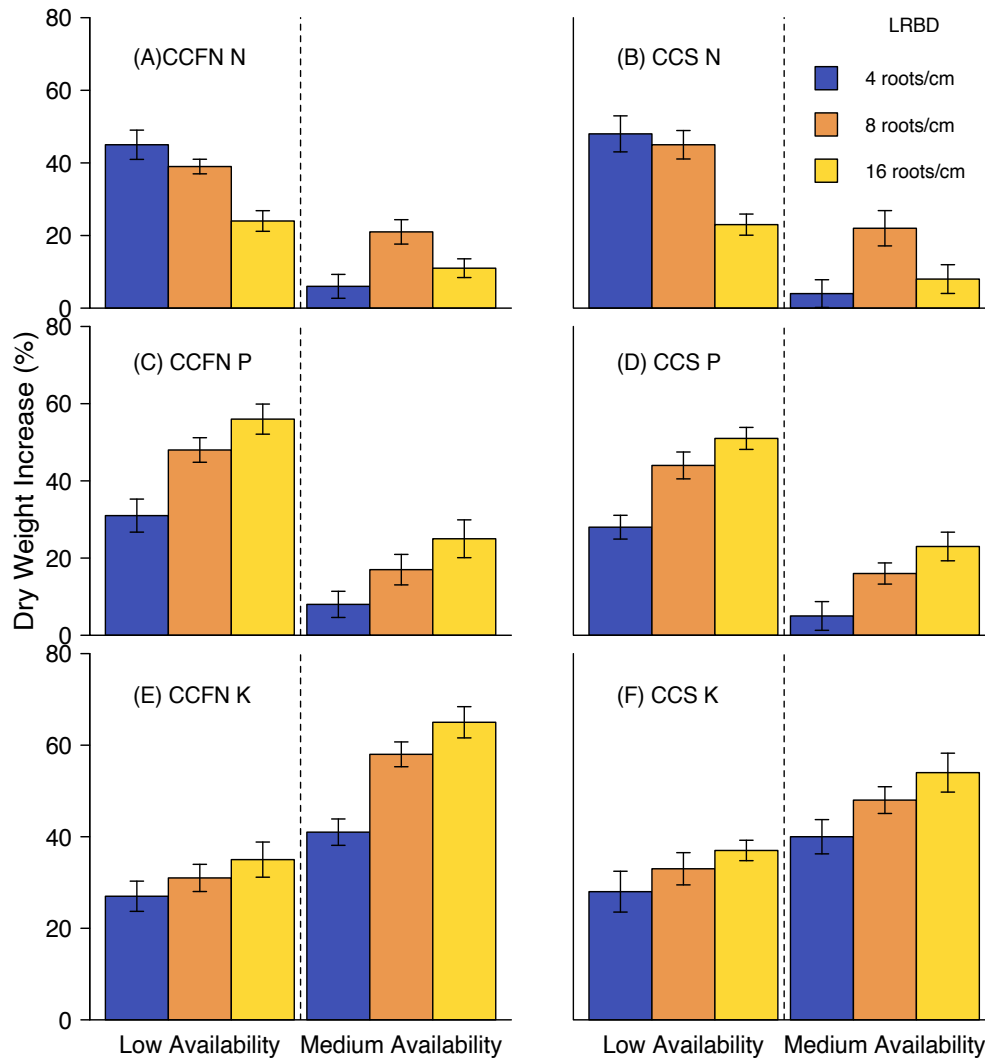

876 Figure 8. Interactions between larger CCS and Lateral Root Branching Density (LRBD) (A, C and  
 877 E), and reduced CCFN and LRBD (B, D, and F) under low or medium soil nitrogen, phosphorus  
 878 or potassium availability. CCS and CCFN used in this scenario are both at the least level of  
 879 metabolic carbon demand (largest cell size, reduced cell files). Three levels of Lateral Root  
 880 Branching Density (4, 8, and 16 roots/cm) are shown, the range of which was based on Trachsel et  
 881 al. (2010), as used by Postma and Lynch (2011). Low and medium nitrate levels are 21 kg/ha and  
 882 84 kg/ha respectively. Low and medium phosphorus levels are 0.5 kg/ha and 2 kg/ha respectively.  
 883 Low and medium potassium levels are 0.5 kg/ha and 1.9 kg/ha respectively.

884

885

886

887

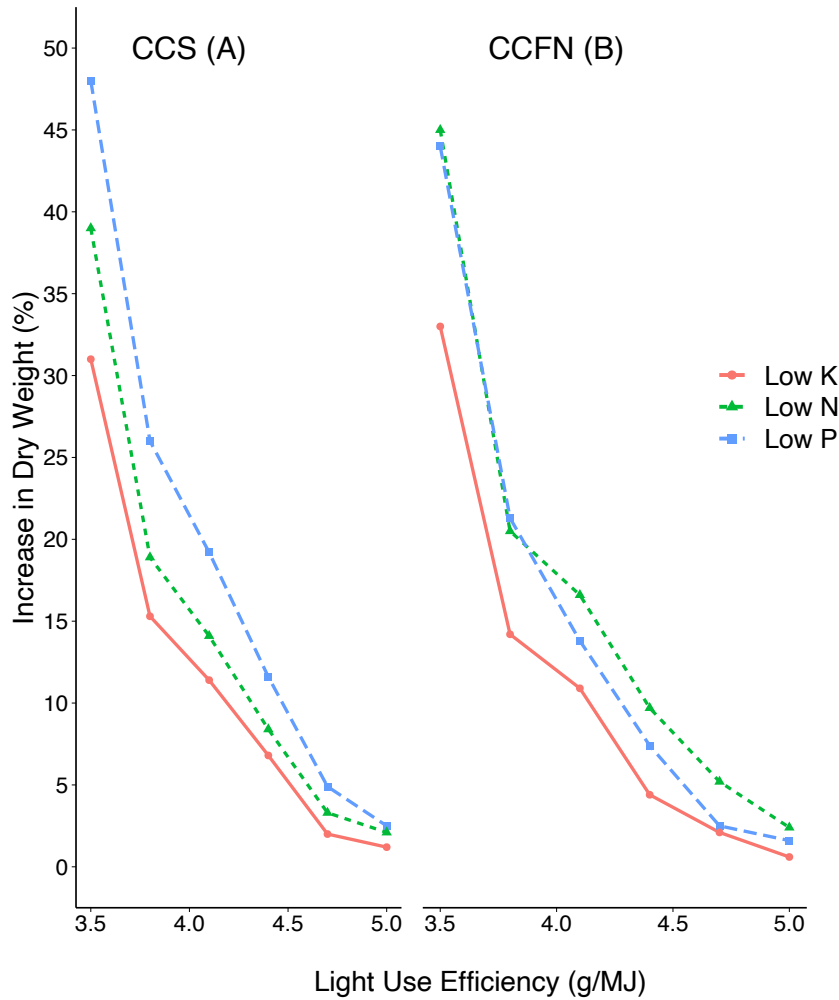

909 Figure 9. Benefits of CCS and CCFN on plants grown under nitrogen or phosphorus deficiencies  
910 as affected by elevated atmospheric CO<sub>2</sub> concentration, as simulated by increased canopy light use  
911 efficiency. Soil phosphorus level was 0.4kg/ha, nitrate level 21kg/ha, and potassium level 1kg/ha.  
912  
913  
914  
915  
916  
917  
918  
919



920 **Appendix**

921

922 **OpenSimRoot Parameterization**

923 OpenSimRoot uses a hierarchical xml formatted input file which is graphically presented  
924 below. The hierarchy places the parameters in a context. For example, the parameter 'specific leaf  
925 area' belongs to the shoot of a specific genotype. In OpenSimRoot parameters can be a single  
926 value, a value drawn from a distribution, or the result of an interpolation table. We have tried to  
927 base all our parameters on our own measurements or data from the literature. We have indicated  
928 the sources behind the parameters. Note that in many cases, we used more than one source and in  
929 some cases we had to convert the measurements using assumptions. A common assumption we  
930 made is that the value was equal for all root classes and or for all genotypes.

931 1 'environment'

932 1.1 'atmosphere'

933 1.1.1 'evaporation' [cm]=f{'time'} [day] x,y pairs :{0 0 1 0.05 2 0.1 3 0.1 4 0.05 5 0.05 6  
934 0.1 7 0.05 8 0.05 9 0.1 10 0.1 11 0.05 12 0.1 13 0.1 14 0.05 15 0.04 16 0.03 17 0.02 18 0.09 19  
935 0.09 20 0.04 21 0.09 22 0.09 23 0.04 24 0.03 25 0.02 26 0.02 27 0.08 28 0.03 29 0.08 30 0.03 31  
936 0.08 32 0.07 33 0.07 34 0.07 35 0.03 36 0.02 37 0.01 38 0 39 0 40 0 41 0 42 0.06}

937 1.1.2 'irradiation' = 4000 [umol.cm-2.day-1]

938 1.1.3 'precipitation' [cm]=f{'time'} [day] x,y pairs :{0 0 1 0 2 1 3 0.29 4 0 5 0 6 0.61 7 0 8  
939 0 9 0.25 10 0.03 11 0 12 0.64 13 0.33 14 0 15 0 16 0 17 0 18 1.8 19 0.2 20 0 21 2.84 22 0.38 23 0  
940 24 0 25 0 26 0 27 0.18 28 0 29 0.46 30 0 31 1.35 32 0.13 33 0.23 34 0.25 35 0 36 0 37 0 38 0 39 0  
941 40 0 41 0 42 1.42} (Rocksprings, PA, weather station data June 2009)

942 1.2 'dimensions'

943 1.2.1 'max corner' = 13 0 30 [cm]

944 1.2.2 'min corner' =-13 -150 -30 [cm]

945 1.3 'silt-loam soil'

946 1.3.1 'bulk density' [g.cm-3]=f{'depth'} [cm] x,y pairs :{-200 1.51 -65 1.51 -47 1.4 -30  
947 1.42 -16 1.29 -5 1.24 0 1.24} (M.B. Postma, University Park, unpublished)

948 1.3.2 'nitrate'

949 1.3.2.1 'adsorption coefficient' = 0 [umol.cm-1]

950 1.3.2.2 'buffer power' [-]=f{'depth'} [cm] x,y pairs :{-1000 0.4 1000 0.4}

951 1.3.2.3 'concentration' [umol.ml-1]=f{'depth'} [cm] x,y pairs :{-1000 1.59 -55 1.59 -45  
952 1.67 -35 2.17 -25 3.15 -15 4.02 -5 2.36 0 2.8 0.01 0 100 0}(M.B. Postma, University Park,  
953 unpublished)

954 1.3.2.4 'diffusion coefficient' [cm2.day-1]=f{'depth'} [cm] x,y pairs :{-1000 0.07 -0 0.07  
955 1e-05 1e-08 1000 1e-08}

956 1.3.2.5 'longitudinal dispersivity' = 1 [cm]

957 1.3.2.6 'r1-r0' = 4 [cm]

958 1.3.2.7 'saturated diffusion coefficient' = 1.6416 [cm2.day-1]

959 1.3.2.8 'transverse dispersivity' = 0.5 [cm]

960 1.3.3 'organic' (Yang and Janssen 2000)

961 1.3.3.1 'C/N ratio microbes' = 10 [g.g-1] 1.3.3.2 'C/N ratio' [g.g-1]=f{'depth'} [cm] x,y  
962 pairs :{-10000 13 0 13}

963 1.3.3.3 'assimilation efficiency microbes' = 1 [-]

964 1.3.3.4 'carbon content' [g.g-1]=f{'depth'} [cm] x,y pairs :{-200 0.005 -40 0.005 -30 0.01  
965 -10 0.02

966 0 0.02}

967 1.3.3.5 'initial relative mineralisation rate' [g.g-1.year-1]=f{'depth'} [cm] x,y pairs :{-  
968 1000 0 -25 0  
969 -10 0.037 0 0.037} (Postma, University Park, Unpublished)  
970 1.3.3.5.1 'multiplier' = 0.1 [-]  
971 1.3.3.6 'speed of aging' = 0.46 [-]  
972 1.3.3.7 'time offset' = 30 [day]  
973 1.3.4 'phosphorus' (S. A. Barber 1995; Bhadoria et al. 1991)  
974 1.3.4.1 'adsorption coefficient' = 1333.3 [umol.cm-1]  
975 1.3.4.2 'buffer power' [-]=f{'depth'} [cm] x,y pairs :{-1000 400 1000 400}  
976 1.3.4.3 'concentration' [umol.ml-1]=f{'depth'} [cm] x,y pairs :{-1000 0.00024 -30  
977 0.00025 -29 0.00175 0 0.00175 0.0001 0 1000 0}  
978 1.3.4.4 'diffusion coefficient' [cm<sup>2</sup>.day-1]=f{'depth'} [cm] x,y pairs :{-1000 0.00019872  
979 1000 0.00019872}  
980 1.3.4.5 'longitudinal dispersivity' = 0 [cm]  
981 1.3.4.6 'r1-r0' = 0.3 [cm]  
982 1.3.4.7 'saturated diffusion coefficient' = 0.00495 [cm<sup>2</sup>.day-1]  
983 1.3.4.8 'transverse dispersivity' = 0 [cm]  
984 1.3.5 'potassium' (Claassen et al. 1986; S. A. Barber 1995; Dunham and Nye 1976)  
985 1.3.5.1 'adsorption coefficient' = 33.3 [umol.cm-1]  
986 1.3.5.2 'buffer power' [-]=f{'depth'} [cm] x,y pairs :{-1000 10 1000 10}  
987 1.3.5.3 'concentration' [umol.ml-1]=f{'depth'} [cm] x,y pairs :{-1000 0.05 -30 0.05 -29  
988 0.15 0 0.15 1e-05 0 1000 0}  
989 1.3.5.4 'diffusion coefficient' [cm<sup>2</sup>.day-1]=f{'depth'} [cm] x,y pairs :{-1000 0.067 1000  
990 0.067}  
991 1.3.5.5 'longitudinal dispersivity' = 1 [cm]  
992 1.3.5.6 'r1-r0' = 1.5 [cm]  
993 1.3.5.7 'saturated diffusion coefficient' = 1.56 [cm<sup>2</sup>.day-1]  
994 1.3.5.8 'transverse dispersivity' = 0.5 [cm]  
995 1.3.6 'water'  
996 1.3.6.1 'initial hydraulic head' [cm]=f{'depth'} [cm] x,y pairs :{-200 0 -151 -50 -50 -150 -  
997 45 -155 -40 -160 -35 -165 -30 -170 -25 -175 -20 -180 -15 -190 -10 -200 -5 -220 -2 -240 -1 -300 -  
998 0 -400} (M.B. Postma, University Park, Unpublished)  
999 1.3.6.2 'residual water content' [100%]=f{'depth'} [cm] x,y pairs :{-300 0.067 0 0.067}  
1000 (Hodnett and Tomasella 2002)  
1001 1.3.6.3 'saturated conductivity' [cm.day-1]=f{'depth'} [cm] x,y pairs :{-300 10.8 0 10.8}  
1002 (Luo et al. 2008)  
1003 1.3.6.4 'saturated water content' [100%]=f{'depth'} [cm] x,y pairs :{-300 0.39 -65 0.39 -  
1004 35 0.39 -25 0.43 -15 0.45 0 0.46} (Luo et al. 2008)  
1005 1.3.6.5 'van genuchten:alpha' [-.cm-1]=f{'depth'} [cm] x,y pairs :{-300 0.02 0 0.02}  
1006 (Hodnett and Tomasella 2002)  
1007 1.3.6.6 'van genuchten:n' [-]=f{'depth'} [cm] x,y pairs :{-300 1.41 0 1.41} (Hodnett and  
1008 Tomasella 2002)  
1009 1.3.6.7 'volumetric water content in Barber Cushman' = 0.3 [cm<sup>3</sup>.cm-3]  
1010 1.4 'loamy-sand soil'  
1011 1.4.1 'water'  
1012 1.4.1.1 'initial hydraulic head' [cm]=f{'depth'} [cm] x,y pairs :{-200 -0 -90 -110 -32 -168  
1013 -28 -172 -0 -200}  
1014 1.4.1.2 'residual water content' [100%]=f{'depth'} [cm] x,y pairs :{-300 0.057 0 0.057}  
1015 1.4.1.3 'saturated conductivity' [cm.day-1]=f{'depth'} [cm] x,y pairs :{-200 400 0 400}

1016 1.4.1.4 'saturated water content' [100%]=f{'depth'} [cm] x,y pairs :{-200 0.339 -32 0.339  
1017 -28 0.399 0 0.399}  
1018 1.4.1.5 'van genuchten:alpha' [-.cm-1]=f{'depth'} [cm] x,y pairs :{-300 0.033 -30 0.033 -  
1019 28 0.038 0 0.038}  
1020 1.4.1.6 'van genuchten:n' [-]=f{'depth'} [cm] x,y pairs :{-200 1.6024 -32 1.6024 -28  
1021 1.3757 0 1.3757}  
1022 1.4.1.7 'volumetric water content in Barber Cushman' = 0.18 [cm<sup>3</sup>.cm-3]  
1023 1.4.2 see silt-loam soil for other parameters  
1024 2 'plant parameters'  
1025 2.1.1 'braceroots'  
1026 2.1.1.1 'aerenchyma formation' [100%]=f{'age'} [day] x,y pairs :{0 0 3 0 5 0.1 10 0.25 20  
1027 0.393 1000 0.393} (Fan, Zhu, et al. 2003)  
1028 'cell size' [um<sup>2</sup>]={101 150 200 250 300 350 400 450 500 533} (Chimungu et al., 2014a)  
1029 'cell file number' [#]={8 9 10 11 12 13 14 15 16 17}  
1030 2.1.1.2 'branch list'  
1031 2.1.1.2.1 'lateral of crown roots'  
1032 2.1.1.2.1.1 'allow branches to form above ground' = 0 [-]  
1033 2.1.1.2.1.2 'branching frequency' [cm]=f{'uniform distribution'} minimum=0.1  
1034 maximum=0.3  
1035 2.1.1.2.1.3 'branching spatial offset' = 12 [cm]  
1036 2.1.1.2.1.4 'length root tip' = 10.93 [cm]  
1037 2.1.1.2.1.5 'number of branches/whorl' = 1 [#]  
1038 2.1.1.3 'branching angle' = 140 [degrees]  
1039 2.1.1.4 'density' = 0.094 [g.cm-3] (Pahlavanian and Silk 1988)  
1040 2.1.1.5 'diameter' [cm]=f{'age'} [day] x,y pairs :{0 0.4 8 0.4 15 0.15 24 0.1 100 0.1}  
1041 2.1.1.6 'gravitropism.v2' [cm]=f{'uniform distribution'} minimum=-0.01 maximum=-  
1042 0.005  
1043 2.1.1.7 'growth rate' [cm.day-1]=f{'age'} [day] x,y pairs :{0 0.01 5 1 10 4.5 17 4.5 22 0  
1044 1000 0}  
1045 2.1.1.8 'length root tip without xylem vessels' = 2 [cm]  
1046 2.1.1.9 'longitudinal growth rate multiplier' [cm]=f{'uniform distribution'} minimum=0.7  
1047 maximum=1  
1048 2.1.1.10 'nitrate'  
1049 2.1.1.10.1 'Cmin' = 0.001 [umol.ml-1]  
1050 2.1.1.10.2 'Imax' [umol.cm-2.day-1]=f{'age'} [day] x,y pairs :{0 1.21 2 2.1 40 2.1}  
1051 2.1.1.10.3 'Km' [umol.ml-1]=f{'age'} [day] x,y pairs :{0 0.0157 2 0.0522 40 0.0522}  
1052 2.1.1.10.4 'minimal nutrient concentration' = 600 [umol.g-1]  
1053 2.1.1.10.5 'optimal nutrient concentration' = 1200 [umol.g-1]  
1054 2.1.1.11 'number of xylem poles' = 40 [-]  
1055 2.1.1.11 'phosphorus' (S. A. Barber 1995)  
1056 2.1.1.11.1 'Cmin' = 0.0002 [umol.ml-1]  
1057 2.1.1.11.2 'Imax' = 0.0555 [umol.cm-2.day-1]  
1058 2.1.1.11.3 'Km' = 0.00545 [umol.ml-1]  
1059 2.1.1.11.4 'minimal nutrient concentration' = 30 [umol.g-1]  
1060 2.1.1.11.5 'optimal nutrient concentration' = 60 [umol.g-1]  
1061 2.1.1.12 'potassium' (Barber 1995)  
1062 2.1.1.12.1 'Cmin' = 0.002 [umol.ml-1]  
1063 2.1.1.12.2 'Imax' = 0.467 [umol.cm-2.day-1]  
1064 2.1.1.12.3 'Km' = 0.014 [umol.ml-1]

1065 2.1.1.12.4 'minimal nutrient concentration' = 117 [umol.g-1] 2.1.1.11.5 'optimal nutrient  
1066 concentration' = 234 [umol.g-1] (Silk et al. 1986)  
1067 2.1.1.13 'reduction in respiration due to aerenchyma' [100%]=f{'aerenchymaFormation'}  
1068 [100%] x,y pairs : {0 0 0.3 0.7 0.6 1} (Fan et al. 2003)  
1069 'reduction in respiration due to cell size' [100%]=f{cellSize} [100%] x,y pairs : {101 0  
1070 150 0.07 200 0.14 250 0.17 300 0.25 350 0.32 400 0.37 450 0.43 500 0.51 533 0.57}  
1071 'reduction in respiration due to file number' [100%]=f{fileNumber} [100%] x,y pairs : {17  
1072 0 16 0.05 15 0.13 14 0.17 13 0.23 12 0.3 11 0.35 10 0.42 9 0.49 8 0.52}  
1073 2.1.1.14 'regular topology' = 4 [-]  
1074 2.1.1.15 'relative carbon cost of exudation' [g.cm-1.day-1]=f{'age'} [day] x,y pairs : {0 5e-  
1075 06 100 5e-06} (Groleau-Renaud et al. 1998)  
1076 2.1.1.16 'relative respiration' [g.g-1.day-1]=f{'age'} [day] x,y pairs : {0 0.09 2 0.04 6 0.04  
1077 1000 0.04} (Fan et al., 2003)  
1078 2.1.1.17 'root class id' = 102 [-]  
1079 2.1.1.18 'root hair density' [#.cm-2]=f{'age'} [day] x,y pairs : {0 2000 1 2000 2 2000 10  
1080 2000 30 0 2000 0} (Zhu, Kaeppler, et al. 2005; Mackay and S. Barber 1985)  
1081 2.1.1.19 'root hair diameter' = 0.0005 [cm]  
1082 2.1.1.20 'root hair length' [cm]=f{'age'} [day] x,y pairs : {0 0 1 0 2 0.028 2000 0.028}  
1083 2.4.15.20 (Zhu et al. 2005; Mackay and S. Barber 1985)  
1084 2.1.1.21 'soil impedance.v2' [cm]=f{'uniform distribution'} minimum=-0.03  
1085 maximum=0.03  
1086 2.1.2 'braceroots2'  
1087 2.1.2.1 'aerenchyma formation' [100%]=f{'age'} [day] x,y pairs : {0 0 3 0 5 0.1 10 0.25 20  
1088 0.393 1000 0.393} (Fan et al. 2003)  
1089 'cell size' [um^2]={101 150 200 250 300 350 400 450 500 533} (Chimungu et al., 2014a)  
1090 'cell file number' [#]={8 9 10 11 12 13 14 15 16 17}  
1091 2.1.2.2 'branch list'  
1092 2.1.2.2.1 'lateral of crown roots'  
1093 2.1.2.2.1.1 'allow branches to form above ground' = 0 [-]  
1094 2.1.2.2.1.2 'branching frequency' [cm]=f{'uniform distribution'} minimum=0.1  
1095 maximum=0.4  
1096 2.1.2.2.1.3 'branching spatial offset' = 15 [cm]  
1097 2.1.2.2.1.4 'length root tip' = 10.93 [cm]  
1098 2.1.2.2.1.5 'number of branches/whorl' = 1 [#]  
1099 2.1.2.3 'branching angle' = 130 [degrees]  
1100 2.1.2.4 'density' = 0.094 [g.cm-3]  
1101 2.1.2.5 'diameter' [cm]=f{'age'} [day] x,y pairs : {0 0.5 9 0.5 16 0.2 24 0.1 100 0.1}  
1102 2.1.2.6 'gravitropism.v2' [cm]=f{'uniform distribution'} minimum=-0.01 maximum=-  
1103 0.005  
1104 2.1.2.7 'growth rate' [cm.day-1]=f{'age'} [day] x,y pairs : {0 0.01 5 1 10 4.5 17 4.5 22 0  
1105 1000 0}  
1106 2.1.2.8 'length root tip without xylem vessels' = 2 [cm]  
1107 2.1.2.9 'longitudinal growth rate multiplier' [cm]=f{'uniform distribution'} minimum=0.7  
1108 maximum=1  
1109 2.1.2.10 'nitrate'  
1110 2.1.2.10.1 'Cmin' = 0.001 [umol.ml-1]  
1111 2.1.2.10.2 'Imax' [umol.cm-2.day-1]=f{'age'} [day] x,y pairs : {0 1.21 2 2.1 40 2.1}  
1112 2.1.2.10.3 'Km' [umol.ml-1]=f{'age'} [day] x,y pairs : {0 0.0157 2 0.0522 40 0.0522}  
1113 2.1.2.10.4 'minimal nutrient concentration' = 600 [umol.g-1]

1114 2.1.2.10.5 'optimal nutrient concentration' = 1200 [umol.g-1]  
 1115 2.1.2.11 'number of xylem poles' = 48 [-]  
 1116 2.1.2.12 'phosphorus' (Barber 1995)  
 1117 2.1.2.12.1 'Cmin' = 0.0002 [umol.ml-1]  
 1118 2.1.2.12.2 'Imax' = 0.0555 [umol.cm-2.day-1]  
 1119 2.1.2.12.3 'Km' = 0.00545 [umol.ml-1]  
 1120 2.1.2.12.4 'minimal nutrient concentration' = 30 [umol.g-1]  
 1121 2.1.2.12.5 'optimal nutrient concentration' = 60 [umol.g-1]  
 1122 2.1.2.13 'potassium' (Barber 1995)  
 1123 2.1.2.13.1 'Cmin' = 0.002 [umol.ml-1]  
 1124 2.1.2.13.2 'Imax' = 0.467 [umol.cm-2.day-1]v2.1.2.13.3 'Km' = 0.014 [umol.ml-1]  
 1125 2.1.2.13.4 'minimal nutrient concentration' = 117 [umol.g-1]  
 1126 2.1.2.13.5 'optimal nutrient concentration' = 234 [umol.g-1] (Silk et al. 1986)  
 1127 2.1.2.14 'reduction in respiration due to aerenchyma' [100%]=f{'aerenchymaFormation'}  
 1128 [100%]  
 1129 x,y pairs : {0 0 0.3 0.7 0.6 1} (Fan et al. 2003)  
 1130 'reduction in respiration due to cell size' [100%]=f{cellSize} [100%] x,y pairs : {101 0  
 1131 150 0.07 200 0.14 250 0.17 300 0.25 350 0.32 400 0.37 450 0.43 500 0.51 533 0.57}  
 1132 'reduction in respiration due to file number' [100%]=f{filenumber} [100%] x,y pairs : {17  
 1133 0 16 0.05 15 0.13 14 0.17 13 0.23 12 0.3 11 0.35 10 0.42 9 0.49 8 0.52}  
 1134 2.1.2.15 'regular topology' = 3 [-]  
 1135 2.1.2.16 'relative carbon cost of exudation' [g.cm-1.day-1]=f{'age'} [day] x,y pairs : {0 5e-  
 1136 06 100  
 1137 5e-06} (Groleau-Renaud et al. 1998)  
 1138 2.1.2.17 'relative respiration' [g.g-1.day-1]=f{'age'} [day] x,y pairs : {0 0.09 2 0.04 6 0.04  
 1139 1000  
 1140 0.04} (Fan et al., 2003)  
 1141 2.1.2.18 'root class id' = 102 [-]  
 1142 2.1.2.19 'root hair density' [#.cm-2]=f{'age'} [day] x,y pairs : {0 2000 1 2000 2 2000 10  
 1143 2000 30 0  
 1144 2000 0} (Zhu et al. 2005; Mackay and S. Barber 1985)  
 1145 2.1.2.20 'root hair diameter' = 0.0005 [cm]  
 1146 2.1.2.21 'root hair length' [cm]=f{'age'} [day] x,y pairs : {0 0 1 0 2 0.028 2000 0.028}  
 1147 2.4.15.20  
 1148 (Zhu et al. 2005; Mackay and S. Barber 1985)  
 1149 2.1.2.22 'soil impedance.v2' [cm]=f{'uniform distribution'} minimum=-0.03  
 1150 maximum=0.03  
 1151 2.1.3 'finelateral'  
 1152 2.1.3.1 'aerenchyma formation' [100%]=f{'age'} [day] x,y pairs : {0 0 3 0 5 0.1 10 0.25 20  
 1153 0.393 1000 0.393} (Fan et al. 2003)  
 1154 'cell size' [um^2]={101 150 200 250 300 350 400 450 500 533} (Chimungu et al., 2014a)  
 1155 'cell file number' [#]={8 9 10 11 12 13 14 15 16 17}  
 1156 2.1.3.2 'branch list'  
 1157 2.1.3.2.1 'finelateral2'  
 1158 2.1.3.2.1.1 'allow branches to form above ground' = 0 [-]  
 1159 2.1.3.2.1.2 'branching frequency' [cm]=f{'uniform distribution'} minimum=0.4  
 1160 maximum=0.6  
 1161 2.1.3.2.1.3 'length root tip' = 1.5 [cm]  
 1162 2.1.3.3 'branching angle' = 62.83 [degrees]

1163 2.1.3.4 'density' = 0.094 [g.cm-3]  
1164 2.1.3.5 'diameter' = 0.025 [cm]  
1165 2.1.3.6 'gravitropism.v2' = 0 0 0 [cm]  
1166 2.1.3.7 'growth rate' [cm.day-1]=f{'age'} [day] x,y pairs :{0 0.01 1 0.35 6 0 1000 0}  
1167 2.1.3.8 'length root tip without xylem vessels' = 2 [cm]  
1168 2.1.3.9 'longitudinal growth rate multiplier' [cm]=f{'normal distribution'} minimum=0.5  
1169 maximum=1.5 mean=1 stdev=0.1  
1170 2.1.3.10 'nitrate'  
1171 2.1.3.10.1 ' Cmin' = 0.0017 [umol.ml-1]  
1172 2.1.3.10.2 ' Imax' = 1.27 [umol.cm-2.day-1]  
1173 2.1.3.10.3 ' Km' = 0.0027 [umol.ml-1]  
1174 2.1.3.10.4 'minimal nutrient concentration' = 600 [umol.g-1]  
1175 2.1.3.10.5 'optimal nutrient concentration' = 1200 [umol.g-1]  
1176 2.1.3.11 'number of xylem poles' = 4 [-]  
1177 2.1.3.12 'phosphorus' (Barber 1995)  
1178 2.1.3.12.1 ' Cmin' = 0.0002 [umol.ml-1]  
1179 2.1.3.12.2 ' Imax' = 0.0555 [umol.cm-2.day-1]  
1180 2.1.3.12.3 ' Km' = 0.00545 [umol.ml-1]  
1181 2.1.3.12.4 'minimal nutrient concentration' = 30 [umol.g-1]  
1182 2.1.3.12.5 'optimal nutrient concentration' = 60 [umol.g-1]  
1183 2.1.3.13 'potassium' (Barber 1995)  
1184 2.1.3.13.1 ' Cmin' = 0.002 [umol.ml-1]  
1185 2.1.3.13.2 ' Imax' = 0.467 [umol.cm-2.day-1]  
1186 2.1.3.13.3 ' Km' = 0.014 [umol.ml-1]  
1187 2.1.3.13.4 'minimal nutrient concentration' = 117 [umol.g-1]  
1188 2.1.3.13.5 'optimal nutrient concentration' = 234 [umol.g-1] (Silk et al. 1986) (Silk et al.  
1189 1986)  
1190 2.1.3.14 'reduction in respiration due to aerenchyma' [100%]=f{'aerenchymaFormation'}  
1191 [100%] x,y pairs :{0 0 0.3 0.7 0.6 1} (Fan et al. 2003)  
1192 'reduction in respiration due to cell size' [100%]=f{cellSize} [100%] x,y pairs :{101 0  
1193 150 0.07 200 0.14 250 0.17 300 0.25 350 0.32 400 0.37 450 0.43 500 0.51 533 0.57}  
1194 'reduction in respiration due to file number' [100%]=f{filenumber} [100%] x,y pairs :{17  
1195 0 16 0.05 15 0.13 14 0.17 13 0.23 12 0.3 11 0.35 10 0.42 9 0.49 8 0.52}  
1196 2.1.3.15 'relative carbon cost of exudation' [g.cm-1.day-1]=f{'age'} [day] x,y pairs :{0 5e-  
1197 06 100  
1198 1e-06}  
1199 2.1.3.16 'relative respiration' [g.g-1.day-1]=f{'age'} [day] x,y pairs :{0 0.09 2 0.04 6 0.04  
1200 1000  
1201 0.04} (Fan et al., 2003)  
1202 2.1.3.17 'root class id' = 98 [-]  
1203 2.1.3.18 'root hair density' [#.cm-2]=f{'age'} [day] x,y pairs :{0 2000 1 2000 2 2000 10  
1204 2000 30 0  
1205 2000 0} (Zhu et al. 2005; Mackay and S. Barber 1985)  
1206 2.1.3.19 'root hair diameter' = 0.0005 [cm]  
1207 2.1.3.20 'root hair length' [cm]=f{'age'} [day] x,y pairs :{0 0 1 0 2 0.028 2000 0.028}  
1208 2.4.15.20  
1209 (Zhu et al. 2005; Mackay and S. Barber 1985)  
1210 2.1.3.21 'soil impedance.v2' [cm]=f{'uniform distribution'} minimum=-0.05  
1211 maximum=0.05

1212 2.1.4 'finelateral2'

1213 2.1.4.1 'aerenchyma formation' [100%]=f{'age'} [day] x,y pairs :{0 0 3 0 5 0.1 10 0.25 20

1214 0.393 1000 0.393} (Fan et al. 2003)

1215 'cell size' [um<sup>2</sup>]={101 150 200 250 300 350 400 450 500 533} (Chimungu et al., 2014a)

1216 'cell file number' [#]={8 9 10 11 12 13 14 15 16 17}

1217 2.1.4.2 'branch list'

1218 2.1.4.3 'branching angle' = 62.83 [degrees]

1219 2.1.4.4 'density' = 0.094 [g.cm-3]

1220 2.1.4.5 'diameter' = 0.015 [cm]

1221 2.1.4.6 'gravitropism.v2' = 0 0 0 [cm]

1222 2.1.4.7 'growth rate' [cm.day-1]=f{'age'} [day] x,y pairs :{0 0.001 1 0.28 4 0 1000 0}

1223 2.1.4.8 'length root tip without xylem vessels' = 2 [cm]

1224 2.1.4.9 'longitudinal growth rate multiplier' [cm]=f{'normal distribution'} minimum=0.5

1225 maximum=1.5 mean=1 stdev=0.1

1226 2.1.4.10 'nitrate'

1227 2.1.4.10.1 ' Cmin' = 0.0017 [umol.ml-1]

1228 2.1.4.10.2 ' Imax' = 1.27 [umol.cm-2.day-1]

1229 2.1.4.10.3 ' Km' = 0.0027 [umol.ml-1]

1230 2.1.4.10.4 'minimal nutrient concentration' = 600 [umol.g-1]

1231 2.1.4.10.5 'optimal nutrient concentration' = 1200 [umol.g-1]

1232 2.1.4.11 'number of xylem poles' = 4 [-]

1233 2.1.4.12 'phosphorus' (Barber 1995)

1234 2.1.4.12.1 ' Cmin' = 0.0002 [umol.ml-1]

1235 2.1.4.12.2 ' Imax' = 0.0555 [umol.cm-2.day-1]

1236 2.1.4.12.3 ' Km' = 0.00545 [umol.ml-1]

1237 2.1.4.12.4 'minimal nutrient concentration' = 30 [umol.g-1]

1238 2.1.4.12.5 'optimal nutrient concentration' = 60 [umol.g-1]

1239 2.1.4.13 'potassium' (Barber 1995)

1240 2.1.4.13.1 ' Cmin' = 0.002 [umol.ml-1]

1241 2.1.4.13.2 ' Imax' = 0.467 [umol.cm-2.day-1]

1242 2.1.4.13.3 ' Km' = 0.014 [umol.ml-1]

1243 2.1.4.13.4 'minimal nutrient concentration' = 117 [umol.g-1]

1244 2.1.4.13.5 'optimal nutrient concentration' = 234 [umol.g-1] (Silk et al. 1986)

1245 2.1.4.14 'reduction in respiration due to aerenchyma' [100%]=f{'aerenchymaFormation'}

1246 [100%] x,y pairs :{0 0 0.3 0.7 0.6 1} (Fan et al. 2003)

1247 'reduction in respiration due to cell size' [100%]=f{cellSize} [100%] x,y pairs :{101 0

1248 150 0.07 200 0.14 250 0.17 300 0.25 350 0.32 400 0.37 450 0.43 500 0.51 533 0.57}

1249 'reduction in respiration due to file number' [100%]=f{fileNumber} [100%] x,y pairs :{17

1250 0 16 0.05 15 0.13 14 0.17 13 0.23 12 0.3 11 0.35 10 0.42 9 0.49 8 0.52}

1251 2.1.4.15 'relative carbon cost of exudation' [g.cm-1.day-1]=f{'age'} [day] x,y pairs :{0 5e-

1252 06 100

1253 1e-06}

1254 2.1.4.16 'relative respiration' [g.g-1.day-1]=f{'age'} [day] x,y pairs :{0 0.09 2 0.04 6 0.04

1255 1000

1256 0.04} (Fan et al., 2003)

1257 2.1.4.17 'root class id' = 98 [-]

1258 2.1.4.18 'root hair density' [#.cm-2]=f{'age'} [day] x,y pairs :{0 2000 1 2000 2 2000 10

1259 2000 30 0

1260 2000 0} (Zhu et al. 2005; Mackay and S. Barber 1985)

1261 2.1.4.19 'root hair diameter' = 0.0005 [cm]  
1262 2.1.4.20 'root hair length' [cm]=f{'age'} [day] x,y pairs :{0 0 1 0 2 0.028 2000 0.028}  
1263 2.4.15.20  
1264 (Zhu et al. 2005; Mackay and S. Barber 1985)  
1265 2.1.4.21 'soil impedance.v2' [cm]=f{'uniform distribution'} minimum=-0.05  
1266 maximum=0.05  
1267 2.1.5 'mesocotyl'  
1268 2.1.5.1 'aerenchyma formation' [100%]=f{'age'} [day] x,y pairs :{0 0 100 0}  
1269 'cell size' [um^2]={101 150 200 250 300 350 400 450 500 533} (Chimungu et al., 2014a)  
1270 'cell file number' [#]={8 9 10 11 12 13 14 15 16 17}  
1271 2.1.5.2 'branch list'  
1272 2.1.5.2.1 'braceroots'  
1273 2.1.5.2.1.1 'allometric scaling' = 1 [-]  
1274 2.1.5.2.1.2 'branching spatial offset' = 4 [cm]  
1275 2.1.5.2.1.3 'branching time offset' = 25 [day]  
1276 2.1.5.2.1.4 'number of branches/whorl' = 14 [#]  
1277 2.1.5.2.2 'braceroots2'  
1278 2.1.5.2.2.1 'allometric scaling' = 1 [-]  
1279 2.1.5.2.2.2 'branching delay' = 14 [day]  
1280 2.1.5.2.2.3 'branching frequency' = 5 [cm]  
1281 2.1.5.2.2.4 'branching spatial offset' = 7 [cm]  
1282 2.1.5.2.2.5 'branching time offset' = 36 [day]  
1283 2.1.5.2.2.6 'number of branches/whorl' = 20 [#]  
1284 2.1.5.2.3 'nodalroots'  
1285 2.1.5.2.3.1 'branching spatial offset' = 1.5 [cm]  
1286 2.1.5.2.3.2 'branching time offset' = 9 [day]  
1287 2.1.5.2.3.3 'number of branches/whorl' = 3 [#]  
1288 2.1.5.2.4 'nodalroots2'  
1289 2.1.5.2.4.1 'allometric scaling' = 1 [-]  
1290 2.1.5.2.4.2 'branching spatial offset' = 1.9 [cm]  
1291 2.1.5.2.4.3 'branching time offset' = 16 [day]  
1292 2.1.5.2.4.4 'number of branches/whorl' = 4 [#]  
1293 2.1.5.2.5 'nodalroots3'  
1294 2.1.5.2.5.1 'allometric scaling' = 1 [-]  
1295 2.1.5.2.5.2 'branching spatial offset' = 2.1 [cm]  
1296 2.1.5.2.5.3 'branching time offset' = 20 [day]  
1297 2.1.5.2.5.4 'number of branches/whorl' = 5 [#]  
1298 2.1.5.2.6 'nodalroots4'  
1299 2.1.5.2.6.1 'allometric scaling' = 1 [-]  
1300 2.1.5.2.6.2 'branching spatial offset' = 2.3 [cm]  
1301 2.1.5.2.6.3 'branching time offset' = 23 [day]  
1302 2.1.5.2.6.4 'number of branches/whorl' = 6 [#]  
1303 2.1.5.3 'density' = 0.094 [g.cm-3]  
1304 2.1.5.4 'diameter' = 0.15 [cm]  
1305 2.1.5.5 'gravitropism' =-1 [-]  
1306 2.1.5.6 'gravitropism.v2' [cm]=f{'uniform distribution'} minimum=0.5 maximum=1  
1307 2.1.5.7 'growth rate' [cm.day-1]=f{'age'} [day] x,y pairs :{0 1 1 2 2 2 3 2 5 0 1000 0}  
1308 2.1.5.8 'length root tip without xylem vessels' = 2 [cm]  
1309 2.1.5.9 'nitrate'



1310 2.1.5.9.1 'Cmin' = 0 [umol.ml-1]  
 1311 2.1.5.9.2 'Imax' = 0 [umol.cm-2.day-1]  
 1312 2.1.5.9.3 'Km' = 1 [umol.ml-1]  
 1313 2.1.5.9.4 'minimal nutrient concentration' = 600 [umol.g-1]  
 1314 2.1.5.9.5 'optimal nutrient concentration' = 1200 [umol.g-1]  
 1315 2.1.5.10 'number of xylem poles' = 61 [-]  
 1316 2.1.5.11 'phosphorus' (Barber 1995)  
 1317 2.1.5.11.1 'Cmin' = 0.0002 [umol.ml-1]  
 1318 2.1.5.11.2 'Imax' = 0.0555 [umol.cm-2.day-1]  
 1319 2.1.5.11.3 'Km' = 0.00545 [umol.ml-1]  
 1320 2.1.5.11.4 'minimal nutrient concentration' = 30 [umol.g-1]  
 1321 2.1.5.11.5 'optimal nutrient concentration' = 60 [umol.g-1]  
 1322 2.1.5.12 'potassium' (Barber 1995)  
 1323 2.1.5.12.1 'Cmin' = 0.002 [umol.ml-1]  
 1324 2.1.5.12.2 'Imax' = 0.467 [umol.cm-2.day-1]  
 1325 2.1.5.12.3 'Km' = 0.014 [umol.ml-1]  
 1326 2.1.5.12.4 'minimal nutrient concentration' = 117 [umol.g-1]  
 1327 2.1.5.12.5 'optimal nutrient concentration' = 234 [umol.g-1] (Silk et al. 1986)  
 1328 2.1.5.13 'reduction in respiration due to aerenchyma' [100%]=f{'aerenchymaFormation'}  
 1329 [100%]  
 1330 x,y pairs :{0 0 0.3 0.7 0.6 1} (Fan et al. 2003)  
 1331 'reduction in respiration due to cell size' [100%]=f{cellSize} [100%] x,y pairs :{101 0  
 1332 150 0.07 200 0.14 250 0.17 300 0.25 350 0.32 400 0.37 450 0.43 500 0.51 533 0.57}  
 1333 'reduction in respiration due to file number' [100%]=f{filenumber} [100%] x,y pairs :{17  
 1334 0 16 0.05 15 0.13 14 0.17 13 0.23 12 0.3 11 0.35 10 0.42 9 0.49 8 0.52}  
 1335 2.1.5.14 'relative carbon cost of exudation' [g.cm-1.day-1]=f{'age'} [day] x,y pairs :{0 0  
 1336 100 0}  
 1337 2.1.5.15 'relative respiration' [g.g-1.day-1]=f{'age'} [day] x,y pairs :{0 0.09 2 0.04 6 0.04  
 1338 1000  
 1339 0.04} (Fan et al., 2003)  
 1340 2.1.5.16 'root class id' = 97 [-]  
 1341 2.1.5.17 'root hair density' [#.cm-2]=f{'age'} [day] x,y pairs :{0 0 2000 0}  
 1342 2.1.5.18 'root hair diameter' = 0.0005 [cm]  
 1343 2.1.5.19 'root hair length' [cm]=f{'age'} [day] x,y pairs :{0 0 1 0 2 0.028 2000 0.028}  
 1344 2.4.15.20  
 1345 (Zhu et al. 2005; Mackay and S. Barber 1985)  
 1346 2.1.5.20 'soil impedence' = 0.3 [-]  
 1347 2.1.5.21 'soil impedence.v2' [cm]=f{'uniform distribution'} minimum=-0.3 maximum=0.3  
 1348 2.1.5.22 'top boundary' = 0 [-]  
 1349 2.1.6 'lateral'  
 1350 2.1.6.1 'aerenchyma formation' [100%]=f{'age'} [day] x,y pairs :{0 0 3 0 5 0.1 10 0.25 20  
 1351 0.3931000 0.393} (Fan et al. 2003)  
 1352 'cell size' [um^2]={101 150 200 250} (Chimungu et al., 2014a)  
 1353 'cell file number' [#]={4 5 6}  
 1354 2.1.6.2 'bottom boundary' = 1 [-]  
 1355 2.1.6.3 'branch list'  
 1356 2.1.6.3.1 'finelateral'  
 1357 2.1.6.3.1.1 'allow branches to form above ground' = 0 [-]  
 1358 2.1.6.3.1.2 'branching frequency' [cm]=f{'uniform distribution'} minimum=0.15

1359 maximum=0.35  
 1360 2.1.6.3.1.3 'length root tip' = 4 [cm]  
 1361 2.1.6.4 'branching angle' = 90 [degrees]  
 1362 2.1.6.5 'density' = 0.094 [g.cm-3]  
 1363 2.1.6.6 'diameter' = 0.04 [cm]  
 1364 2.1.6.7 'gravitropism.v2' = 0 0 0 [cm]  
 1365 2.1.6.8 'growth rate' [cm.day-1]=f{'age'} [day] x,y pairs :{0 0.01 1 0.2 3 0.4 7 1 11 0  
 1366 1000 0}  
 2.1.6.9 'length root tip without xylem vessels' = 2 [cm]  
 1367 2.1.6.10 'longitudinal growth rate multiplier' [cm]=f{'normal distribution'} minimum=0.1  
 1368 maximum=2 mean=0.7 stdev=0.3  
 1369 2.1.6.11 'nitrate'  
 1370 2.1.6.11.1 ' Cmin' = 0.0017 [umol.ml-1]  
 1371 2.1.6.11.2 ' Imax' = 1.27 [umol.cm-2.day-1]  
 1372 2.1.6.11.3 ' Km' = 0.0027 [umol.ml-1]  
 1373 2.1.6.11.4 'minimal nutrient concentration' = 600 [umol.g-1]  
 1374 2.1.6.11.5 'optimal nutrient concentration' = 1200 [umol.g-1]  
 1375 2.1.6.12 'number of xylem poles' = 4 [-]  
 1376 2.1.6.13 'phosphorus' (Barber 1995)  
 1377 2.1.6.13.1 ' Cmin' = 0.0002 [umol.ml-1]  
 1378 2.1.6.13.2 ' Imax' = 0.0555 [umol.cm-2.day-1]  
 1379 2.1.6.13.3 ' Km' = 0.00545 [umol.ml-1]  
 1380 2.1.6.13.4 'minimal nutrient concentration' = 30 [umol.g-1]  
 1381 2.1.6.13.5 'optimal nutrient concentration' = 60 [umol.g-1]  
 1382 2.1.6.14 'potassium' (Barber 1995)  
 1383 2.1.6.14.1 ' Cmin' = 0.002 [umol.ml-1]  
 1384 2.1.6.14.2 ' Imax' = 0.467 [umol.cm-2.day-1]  
 1385 2.1.6.14.3 ' Km' = 0.014 [umol.ml-1]  
 1386 2.1.6.14.4 'minimal nutrient concentration' = 117 [umol.g-1]  
 1387 2.1.6.14.5 'optimal nutrient concentration' = 234 [umol.g-1] (Silk et al. 1986)  
 1388 2.1.6.15 'reduction in respiration due to aerenchyma' [100%]=f{'aerenchymaFormation'}  
 1389 [100%] x,y pairs :{0 0 0.3 0.7 0.6 1} (Fan et al. 2003)  
 1390 'reduction in respiration due to cell size' [100%]=f{cellSize} [100%] x,y pairs :{101 0  
 1391 150 0.07 200 0.14 250 0.17 300 0.25 350 0.32 400 0.37 450 0.43 500 0.51 533 0.57}  
 1392 'reduction in respiration due to file number' [100%]=f{filenumber} [100%] x,y pairs :{17  
 1393 0 16 0.05 15 0.13 14 0.17 13 0.23 12 0.3 11 0.35 10 0.42 9 0.49 8 0.52}  
 1394 2.1.6.16 'relative carbon cost of exudation' [g.cm-1.day-1]=f{'age'} [day] x,y pairs :{0 5e-  
 1395 06 100  
 1396 3e-06}  
 1397 2.1.6.17 'relative respiration' [g.g-1.day-1]=f{'age'} [day] x,y pairs :{0 0.09 2 0.04 6 0.04  
 1398 1000  
 1399 0.04} (Fan et al., 2003)  
 1400 2.1.6.18 'root class id' = 98 [-]  
 1401 2.1.6.19 'root hair density' [#.cm-2]=f{'age'} [day] x,y pairs :{0 2000 1 2000 2 2000 10  
 1402 2000 30 0  
 1403 2000 0} (Zhu et al. 2005; Mackay and S. Barber 1985)  
 1404 2.1.6.20 'root hair diameter' = 0.0005 [cm]  
 1405 2.1.6.21 'root hair length' [cm]=f{'age'} [day] x,y pairs :{0 0 1 0 2 0.028 2000 0.028}  
 1406 2.4.15.20  
 1407 (Zhu et al. 2005; Mackay and S. Barber 1985)

1408 2.1.6.22 'soil impedance.v2' [cm]=f{'uniform distribution'} minimum=-0.1 maximum=0.1  
1409 2.1.6.23 'top boundary' = 1 [-]  
1410 2.1.7 'lateral of crown roots'  
1411 2.1.7.1 'aerenchyma formation' [100%]=f{'age'} [day] x,y pairs :{0 0 3 0 5 0.1 10 0.25 20  
1412 0.393 1000 0.393} (Fan et al. 2003)  
1413 'cell size' [um^2]={101 150 200 250 300 350 400 450 500 533} (Chimungu et al., 2014a)  
1414 'cell file number' [#]={8 9 10 11 12 13 14 15 16 17}  
1415 2.1.7.2 'branch list'  
1416 2.1.7.2.1 'lateral'  
1417 2.1.7.2.1.1 'allow branches to form above ground' = 0 [-]  
1418 2.1.7.2.1.2 'branching frequency' [cm]=f{'uniform distribution'} minimum=0.25  
1419 maximum=0.35  
1420 2.1.7.2.1.3 'length root tip' = 5 [cm]  
1421 2.1.7.3 'branching angle' = 90 [degrees]  
1422 2.1.7.4 'density' = 0.094 [g.cm-3]  
1423 2.1.7.5 'diameter' = 0.07 [cm]  
1424 2.1.7.6 'gravitropism' = 0 [-]  
1425 2.1.7.7 'gravitropism.v2' = 0 0 0 [cm]  
1426 2.1.7.8 'growth rate' [cm.day-1]=f{'age'} [day] x,y pairs :{0 0.1 1 0.5 3 1.2 12 1.2 18 0  
1427 1000 0}  
1428 2.1.7.9 'length root tip without xylem vessels' = 2 [cm]  
1429 2.1.7.10 'longitudinal growth rate multiplier' [cm]=f{' normal distribution'} minimum=0.1  
1430 maximum=1 mean=0.4 stdev=0.3  
1431 2.1.7.11 'nitrate'  
1432 2.1.7.11.1 ' Cmin' = 0.0017 [umol.ml-1]  
1433 2.1.7.11.2 ' Imax' = 1.27 [umol.cm-2.day-1]  
1434 2.1.7.11.3 ' Km' = 0.0027 [umol.ml-1]  
1435 2.1.7.11.4 'minimal nutrient concentration' = 600 [umol.g-1]  
1436 2.1.7.11.5 'optimal nutrient concentration' = 1200 [umol.g-1]  
1437 2.1.7.12 'number of xylem poles' = 4 [-]  
1438 2.1.7.13 'phosphorus' (Barber 1995)  
1439 2.1.7.13.1 ' Cmin' = 0.0002 [umol.ml-1]  
1440 2.1.7.13.2 ' Imax' = 0.0555 [umol.cm-2.day-1]  
1441 2.1.7.13.3 ' Km' = 0.00545 [umol.ml-1]  
1442 2.1.7.13.4 'minimal nutrient concentration' = 30 [umol.g-1]  
1443 2.1.7.13.5 'optimal nutrient concentration' = 60 [umol.g-1]  
1444 2.1.7.14 'potassium' (Barber 1995)  
1445 2.1.7.14.1 ' Cmin' = 0.002 [umol.ml-1]  
1446 2.1.7.14.2 ' Imax' = 0.467 [umol.cm-2.day-1]  
1447 2.1.7.14.3 ' Km' = 0.014 [umol.ml-1]  
1448 2.1.7.14.4 'minimal nutrient concentration' = 117 [umol.g-1]  
1449 2.1.7.14.5 'optimal nutrient concentration' = 234 [umol.g-1] (Silk et al. 1986)  
1450 2.1.7.15 'reduction in respiration due to aerenchyma' [100%]=f{'aerenchymaFormation'}  
1451 [100%] x,y pairs :{0 0 0.3 0.7 0.6 1} (Fan et al. 2003)  
1452 'reduction in respiration due to cell size' [100%]=f{cellSize} [100%] x,y pairs :{101 0  
1453 150 0.07 200 0.14 250 0.17 300 0.25 350 0.32 400 0.37 450 0.43 500 0.51 533 0.57}  
1454 'reduction in respiration due to file number' [100%]=f{filenumber} [100%] x,y pairs :{17  
1455 0 16 0.05 15 0.13 14 0.17 13 0.23 12 0.3 11 0.35 10 0.42 9 0.49 8 0.52}

1456 2.1.7.16 'relative carbon cost of exudation' [g.cm-1.day-1]=f{'age'} [day] x,y pairs :{0 5e-  
1457 06 100  
1458 4e-06}  
1459 2.1.7.17 'relative respiration' [g.g-1.day-1]=f{'age'} [day] x,y pairs :{0 0.09 2 0.04 6 0.04  
1460 1000  
1461 0.04} (Fan et al., 2003)  
1462 2.1.7.18 'root class id' = 98 [-]  
1463 2.1.7.19 'root hair density' [#.cm-2]=f{'age'} [day] x,y pairs :{0 2000 1 2000 2 2000 10  
1464 2000 30 0  
1465 2000 0} (Zhu et al. 2005; Mackay and S. Barber 1985)  
1466 2.1.7.20 'root hair diameter' = 0.0005 [cm]  
1467 2.1.7.21 'root hair length' [cm]=f{'age'} [day] x,y pairs :{0 0 1 0 2 0.028 2000 0.028}  
1468 2.4.15.20  
1469 (Zhu et al. 2005; Mackay and S. Barber 1985)  
1470 2.1.7.22 'soil impedance' = 0.05 [-]  
1471 2.1.7.23 'soil impedance.v2' [cm]=f{'uniform distribution'} minimum=-0.05  
1472 maximum=0.05  
1473 2.1.8 'nodalroots'  
1474 2.1.8.1 'aerenchyma formation' [100%]=f{'age'} [day] x,y pairs :{0 0 3 0 5 0.1 10 0.25 20  
1475 0.393 1000 0.393} (Fan et al. 2003)  
1476 'cell size' [um^2]={101 150 200 250 300 350 400 450 500 533} (Chimungu et al., 2014a)  
1477 'cell file number' [#]={8 9 10 11 12 13 14 15 16 17}  
1478 2.1.8.2 'branch list'  
1479 2.1.8.2.1 'lateral'  
1480 2.1.8.2.1.1 'allow branches to form above ground' = 0 [-]  
1481 2.1.8.2.1.2 'branching frequency' [cm]=f{'uniform distribution'} minimum=0.1  
1482 maximum=0.3  
1483 2.1.8.2.1.3 'length root tip' = 10.93 [cm]  
1484 2.1.8.3 'branching angle' = 160 [degrees]  
1485 2.1.8.4 'density' = 0.094 [g.cm-3]  
1486 2.1.8.5 'diameter' [cm]=f{'age'} [day] x,y pairs :{0 0.12 10 0.09 100 0.09}  
1487 2.1.8.6 'gravitropism.v2' [cm]=f{'uniform distribution'} minimum=-0.01 maximum=-  
1488 0.005  
1489 2.1.8.7 'growth rate' [cm.day-1]=f{'age'} [day] x,y pairs :{0 0.01 1 1 3 4.5 28 4.5 38 0  
1490 1000 0}  
1491 2.1.8.8 'length root tip without xylem vessels' = 2 [cm]  
1492 2.1.8.9 'longitudinal growth rate multiplier' [cm]=f{'normal distribution'} minimum=0.6  
1493 maximum=1.2 mean=1 stdev=0.1  
1494 2.1.8.10 'nitrate'  
1495 2.1.8.10.1 'Cmin' = 0.001 [umol.ml-1]  
1496 2.1.8.10.2 'Imax' [umol.cm-2.day-1]=f{'age'} [day] x,y pairs :{0 1.21 2 2.1 40 2.1}  
1497 2.1.8.10.3 'Km' [umol.ml-1]=f{'age'} [day] x,y pairs :{0 0.0157 2 0.0522 40 0.0522}  
1498 2.1.8.10.4 'minimal nutrient concentration' = 600 [umol.g-1]  
1499 2.1.8.10.5 'optimal nutrient concentration' = 1200 [umol.g-1]  
1500 2.1.8.11 'number of xylem poles' = 10 [-]  
1501 2.1.8.12 'phosphorus' (Barber 1995)  
1502 2.1.8.12.1 'Cmin' = 0.0002 [umol.ml-1]  
1503 2.1.8.12.2 'Imax' = 0.0555 [umol.cm-2.day-1]  
1504 2.1.8.12.3 'Km' = 0.00545 [umol.ml-1]

1505 2.1.8.12.4 'minimal nutrient concentration' = 30 [umol.g-1]  
 1506 2.1.8.12.5 'optimal nutrient concentration' = 60 [umol.g-1]  
 1507 2.1.8.13 'potassium' (Barber 1995)  
 1508 2.1.8.13.1 'Cmin' = 0.002 [umol.ml-1]  
 1509 2.1.8.13.2 'Imax' = 0.467 [umol.cm-2.day-1]  
 1510 2.1.8.13.3 'Km' = 0.014 [umol.ml-1]  
 1511 2.1.8.13.4 'minimal nutrient concentration' = 117 [umol.g-1]  
 1512 2.1.8.13.5 'optimal nutrient concentration' = 234 [umol.g-1] (Silk et al. 1986)  
 1513 2.1.8.14 'reduction in respiration due to aerenchyma' [100%]=f{'aerenchymaFormation'}  
 1514 [100%] x,y pairs :{0 0 0.3 0.7 0.6 1} (Fan et al. 2003)  
 1515 'reduction in respiration due to cell size' [100%]=f{cellSize} [100%] x,y pairs :{101 0  
 1516 150 0.07 200 0.14 250 0.17 300 0.25 350 0.32 400 0.37 450 0.43 500 0.51 533 0.57}  
 1517 'reduction in respiration due to file number' [100%]=f{fileNumber} [100%] x,y pairs :{17  
 1518 0 16 0.05 15 0.13 14 0.17 13 0.23 12 0.3 11 0.35 10 0.42 9 0.49 8 0.52}  
 1519 2.1.8.15 'regular topology' = 3 [-]  
 1520 2.1.8.16 'relative carbon cost of exudation' [g.cm-1.day-1]=f{'age'} [day] x,y pairs :{0 5e-  
 1521 06 100  
 1522 5e-06} (Groleau-Renaud et al. 1998)  
 1523 2.1.8.17 'relative respiration' [g.g-1.day-1]=f{'age'} [day] x,y pairs :{0 0.09 2 0.04 6 0.04  
 1524 1000  
 1525 0.04} (Fan et al., 2003)  
 1526 2.1.8.18 'root class id' = 101 [-]  
 1527 2.1.8.19 'root hair density' [#.cm-2]=f{'age'} [day] x,y pairs :{0 2000 1 2000 2 2000 10  
 1528 2000 30 0  
 1529 2000 0} (Zhu et al. 2005; Mackay and S. Barber 1985)  
 1530 2.1.8.20 'root hair diameter' = 0.0005 [cm]  
 1531 2.1.8.21 'root hair length' [cm]=f{'age'} [day] x,y pairs :{0 0 1 0 2 0.028 2000 0.028}  
 1532 2.4.15.20  
 1533 (Zhu et al. 2005; Mackay and S. Barber 1985)  
 1534 2.1.8.22 'soil impedance.v2' [cm]=f{'uniform distribution'} minimum=-0.02  
 1535 maximum=0.02  
 1536 2.1.8.23 'topology offset' = 0 [-]  
 1537 2.1.9 'nodalroots2'  
 1538 2.1.9.1 'aerenchyma formation' [100%]=f{'age'} [day] x,y pairs :{0 0 3 0 5 0.1 10 0.25 20  
 1539 0.393 1000 0.393} (Fan et al. 2003)  
 1540 'cell size' [um^2]={101 150 200 250 300 350 400 450 500 533} (Chimungu et al., 2014a)  
 1541 'cell file number' [#]={8 9 10 11 12 13 14 15 16 17}  
 1542 2.1.9.2 'branch list'  
 1543 2.1.9.2.1 'lateral'  
 1544 2.1.9.2.1.1 'allow branches to form above ground' = 0 [-]  
 1545 2.1.9.2.1.2 'branching frequency' [cm]=f{'uniform distribution'} minimum=0.1  
 1546 maximum=0.3  
 1547 2.1.9.2.1.3 'length root tip' = 10.93 [cm]  
 1548 2.1.9.3 'branching angle' = 150 [degrees]  
 1549 2.1.9.4 'density' = 0.094 [g.cm-3]  
 1550 2.1.9.5 'diameter' [cm]=f{'age'} [day] x,y pairs :{0 0.14 10 0.09 100 0.09}  
 1551 2.1.9.6 'gravitropism.v2' [cm]=f{'uniform distribution'} minimum=-0.01 maximum=-  
 1552 0.005

1553 2.1.9.7 'growth rate' [cm.day-1]=f{'age'} [day] x,y pairs :{0 0.01 1 1 3 4.5 28 4.5 38 0  
1554 1000 0}  
1555 2.1.9.8 'length root tip without xylem vessels' = 2 [cm]  
1556 2.1.9.9 'longitudinal growth rate multiplier' [cm]=f{'normal distribution'} minimum=0.6  
1557 maximum=1.2 mean=1 stdev=0.1  
1558 2.1.9.10 'nitrate'  
1559 2.1.9.10.1 ' Cmin' = 0.001 [umol.ml-1]  
1560 2.1.9.10.2 ' Imax' [umol.cm-2.day-1]=f{'age'} [day] x,y pairs :{0 1.21 2 2.1 40 2.1}  
1561 2.1.9.10.3 ' Km' [umol.ml-1]=f{'age'} [day] x,y pairs :{0 0.0157 2 0.0522 40 0.0522}  
1562 2.1.9.10.4 'minimal nutrient concentration' = 600 [umol.g-1]  
1563 2.1.9.10.5 'optimal nutrient concentration' = 1200 [umol.g-1]  
1564 2.1.9.11 'number of xylem poles' = 18 [-]  
1565 2.1.9.12 'phosphorus' (Barber 1995)  
1566 2.1.9.12.1 ' Cmin' = 0.0002 [umol.ml-1]  
1567 2.1.9.12.2 ' Imax' = 0.0555 [umol.cm-2.day-1]  
1568 2.1.9.12.3 ' Km' = 0.00545 [umol.ml-1]  
1569 2.1.9.12.4 'minimal nutrient concentration' = 30 [umol.g-1]  
1570 2.1.9.12.5 'optimal nutrient concentration' = 60 [umol.g-1]  
1571 2.1.9.13 'potassium' (Barber 1995)  
1572 2.1.9.13.1 ' Cmin' = 0.002 [umol.ml-1]  
1573 2.1.9.13.2 ' Imax' = 0.467 [umol.cm-2.day-1]  
1574 2.1.9.13.3 ' Km' = 0.014 [umol.ml-1]  
1575 2.1.9.13.4 'minimal nutrient concentration' = 117 [umol.g-1]  
1576 2.1.9.13.5 'optimal nutrient concentration' = 234 [umol.g-1] (Silk et al. 1986)  
1577 2.1.9.14 'reduction in respiration due to aerenchyma' [100%]=f{'aerenchymaFormation'}  
1578 [100%] x,y pairs :{0 0 0.3 0.7 0.6 1} (Fan et al. 2003)  
1579 'reduction in respiration due to cell size' [100%]=f{'cellSize'} [100%] x,y pairs :{101 0  
1580 150 0.07 200 0.14 250 0.17 300 0.25 350 0.32 400 0.37 450 0.43 500 0.51 533 0.57}  
1581 'reduction in respiration due to file number' [100%]=f{'filenumber'} [100%] x,y pairs :{17  
1582 0 16 0.05 15 0.13 14 0.17 13 0.23 12 0.3 11 0.35 10 0.42 9 0.49 8 0.52}  
1583 2.1.9.15 'regular topology' = 0 [-]  
1584 2.1.9.16 'relative carbon cost of exudation' [g.cm-1.day-1]=f{'age'} [day] x,y pairs :{0 5e-  
1585 06 100  
1586 5e-06} (Groleau-Renaud et al. 1998)  
1587 2.1.9.17 'relative respiration' [g.g-1.day-1]=f{'age'} [day] x,y pairs :{0 0.09 2 0.04 6 0.04  
1588 1000 0.04} (Fan et al., 2003)  
1589 2.1.9.18 'root class id' = 101 [-]  
1590 2.1.9.19 'root hair density' [#.cm-2]=f{'age'} [day] x,y pairs :{0 2000 1 2000 2 2000 10  
1591 2000 30 0  
1592 2000 0} (Zhu et al. 2005; Mackay and S. Barber 1985)  
1593 2.1.9.20 'root hair diameter' = 0.0005 [cm]  
1594 2.1.9.21 'root hair length' [cm]=f{'age'} [day] x,y pairs :{0 0 1 0 2 0.028 2000 0.028}  
1595 2.4.15.20  
1596 (Zhu et al. 2005; Mackay and S. Barber 1985)  
1597 2.1.9.22 'soil impedance.v2' [cm]=f{'uniform distribution'} minimum=-0.02  
1598 maximum=0.02  
1599 2.1.9.23 'topology offset' = 0 [-]  
1600 2.1.10 'nodalroots3'

1601 2.1.10.1 'aerenchyma formation' [100%]=f{'age'} [day] x,y pairs :{0 0 3 0 5 0.1 10 0.25  
1602 20 0.393 1000 0.393} (Fan et al. 2003)  
1603 'cell size' [um<sup>2</sup>]={101 150 200 250 300 350 400 450 500 533} (Chimungu et al., 2014a)  
1604 'cell file number' [#]={8 9 10 11 12 13 14 15 16 17}  
1605 2.1.10.2 'branch list'  
1606 2.1.10.2.1 'lateral'  
1607 2.1.10.2.1.1 'allow branches to form above ground' = 0 [-]  
1608 2.1.10.2.1.2 'branching frequency' [cm]=f{'uniform distribution'} minimum=0.1  
1609 maximum=0.3  
1610 2.1.10.2.1.3 'length root tip' = 10.93 [cm] 2.1.10.3 'branching angle' = 140 [degrees]  
1611 2.1.10.4 'density' = 0.094 [g.cm-3]  
1612 2.1.10.5 'diameter' [cm]=f{'age'} [day] x,y pairs :{0 0.16 10 0.1 100 0.1}  
1613 2.1.10.6 'gravitropism.v2' [cm]=f{'uniform distribution'} minimum=-0.01 maximum=-  
1614 0.005  
1615 2.1.10.7 'growth rate' [cm.day-1]=f{'age'} [day] x,y pairs :{0 0.01 1 1 3 4.5 28 4.5 38 0  
1616 1000 0}  
1617 2.1.10.8 'length root tip without xylem vessels' = 2 [cm]  
1618 2.1.10.9 'longitudinal growth rate multiplier' [cm]=f{'normal distribution'} minimum=0.6  
1619 maximum=1.2 mean=1 stdev=0.1  
1620 2.1.10.10 'nitrate'  
1621 2.1.10.10.1 'Cmin' = 0.001 [umol.ml-1]  
1622 2.1.10.10.2 'Imax' [umol.cm-2.day-1]=f{'age'} [day] x,y pairs :{0 1.21 2 2.1 40 2.1}  
1623 2.1.10.10.3 'Km' [umol.ml-1]=f{'age'} [day] x,y pairs :{0 0.0157 2 0.0522 40 0.0522}  
1624 2.1.10.10.4 'minimal nutrient concentration' = 600 [umol.g-1]  
1625 2.1.10.10.5 'optimal nutrient concentration' = 1200 [umol.g-1]  
1626 2.1.10.11 'number of xylem poles' = 24 [-]  
1627 2.1.10.12 'phosphorus' (Barber 1995)  
1628 2.1.10.12.1 'Cmin' = 0.0002 [umol.ml-1]  
1629 2.1.10.12.2 'Imax' = 0.0555 [umol.cm-2.day-1]  
1630 2.1.10.12.3 'Km' = 0.00545 [umol.ml-1]  
1631 2.1.10.12.4 'minimal nutrient concentration' = 30 [umol.g-1]  
1632 2.1.10.12.5 'optimal nutrient concentration' = 60 [umol.g-1]  
1633 2.1.10.13 'potassium' (Barber 1995)  
1634 2.1.10.13.1 'Cmin' = 0.002 [umol.ml-1]  
1635 2.1.10.13.2 'Imax' = 0.467 [umol.cm-2.day-1]  
1636 2.1.10.13.3 'Km' = 0.014 [umol.ml-1]  
1637 2.1.10.13.4 'minimal nutrient concentration' = 117 [umol.g-1]  
1638 2.1.10.13.5 'optimal nutrient concentration' = 234 [umol.g-1] (Silk et al. 1986)  
1639 2.1.10.14 'reduction in respiration due to aerenchyma' [100%]=f{'aerenchymaFormation'}  
1640 [100%] x,y pairs :{0 0 0.3 0.7 0.6 1} (Fan et al. 2003)  
1641 'reduction in respiration due to cell size' [100%]=f{cellSize} [100%] x,y pairs :{101 0  
1642 150 0.07 200 0.14 250 0.17 300 0.25 350 0.32 400 0.37 450 0.43 500 0.51 533 0.57}  
1643 'reduction in respiration due to file number' [100%]=f{filenumber} [100%] x,y pairs :{17  
1644 0 16 0.05 15 0.13 14 0.17 13 0.23 12 0.3 11 0.35 10 0.42 9 0.49 8 0.52}  
1645 2.1.10.15 'regular topology' = 0 [-]  
1646 2.1.10.16 'relative carbon cost of exudation' [g.cm-1.day-1]=f{'age'} [day] x,y pairs :{0  
1647 5e-06 100  
1648 5e-06} (Groleau-Renaud et al. 1998)

1649 2.1.10.17 'relative respiration' [g.g-1.day-1]=f{'age'} [day] x,y pairs :{0 0.09 2 0.04 6  
1650 0.04 1000  
1651 0.04} (Fan et al., 2003)  
1652 2.1.10.18 'root class id' = 101 [-]  
1653 2.1.10.19 'root hair density' [#.cm-2]=f{'age'} [day] x,y pairs :{0 2000 1 2000 2 2000 10  
1654 2000 30 0  
1655 2000 0} (Zhu et al. 2005; Mackay and S. Barber 1985)  
1656 2.1.10.20 'root hair diameter' = 0.0005 [cm]  
1657 2.1.10.21 'root hair length' [cm]=f{'age'} [day] x,y pairs :{0 0 1 0 2 0.028 2000 0.028}  
1658 2.4.15.20  
1659 (Zhu et al. 2005; Mackay and S. Barber 1985)  
1660 2.1.10.22 'soil impedance.v2' [cm]=f{'uniform distribution'} minimum=-0.02  
1661 maximum=0.02  
1662 2.1.10.23 'topology offset' = 0 [-]  
1663 2.1.11 'nodalroots4'  
1664 2.1.11.1 'aerenchyma formation' [100%]=f{'age'} [day] x,y pairs :{0 0 3 0 5 0.1 10 0.25  
1665 20 0.393 1000 0.393} (Fan et al. 2003)  
1666 'cell size' [um^2]={101 150 200 250 300 350 400 450 500 533} (Chimungu et al., 2014a)  
1667 'cell file number' [#]={8 9 10 11 12 13 14 15 16 17}  
1668 2.1.11.2 'branch list'  
1669 2.1.11.2.1 'lateral'  
1670 2.1.11.2.1.1 'allow branches to form above ground' = 0 [-]  
1671 2.1.11.2.1.2 'branching frequency' [cm]=f{'uniform distribution'} minimum=0.1  
1672 maximum=0.3  
1673 2.1.11.2.1.3 'length root tip' = 10.93 [cm]  
1674 2.1.11.3 'branching angle' = 130 [degrees]  
1675 2.1.11.4 'density' = 0.094 [g.cm-3]  
1676 2.1.11.5 'diameter' [cm]=f{'age'} [day] x,y pairs :{0 0.2 10 0.11 100 0.11}  
1677 2.1.11.6 'gravitropism.v2' [cm]=f{'uniform distribution'} minimum=-0.01 maximum=-  
1678 0.005  
1679 2.1.11.7 'growth rate' [cm.day-1]=f{'age'} [day] x,y pairs :{0 0.01 1 1 3 4.5 28 4.5 38 0  
1680 1000 0}  
1681 2.1.11.8 'length root tip without xylem vessels' = 2 [cm]  
1682 2.1.11.9 'longitudinal growth rate multiplier' [cm]= f{'normal distribution'} minimum=0.6  
1683 maximum=1.2 mean=1 stdev=0.1  
1684 2.1.11.10 'nitrate'  
1685 2.1.11.10.1 ' Cmin' = 0.001 [umol.ml-1]  
1686 2.1.11.10.2 ' Imax' [umol.cm-2.day-1]=f{'age'} [day] x,y pairs :{0 1.21 2 2.1 40 2.1}  
1687 2.1.11.10.3 ' Km' [umol.ml-1]=f{'age'} [day] x,y pairs :{0 0.0157 2 0.0522 40 0.0522}  
1688 2.1.11.10.4 'minimal nutrient concentration' = 600 [umol.g-1]  
1689 2.1.11.10.5 'optimal nutrient concentration' = 1200 [umol.g-1]  
1690 2.1.11.11 'number of xylem poles' = 32 [-]  
1691 2.1.11.12 'phosphorus' (Barber 1995)  
1692 2.1.11.12.1 ' Cmin' = 0.0002 [umol.ml-1]  
1693 2.1.11.12.2 ' Imax' = 0.0555 [umol.cm-2.day-1]  
1694 2.1.11.12.3 ' Km' = 0.00545 [umol.ml-1]  
1695 2.1.11.12.4 'minimal nutrient concentration' = 30 [umol.g-1]  
1696 2.1.11.12.5 'optimal nutrient concentration' = 60 [umol.g-1]  
1697 2.1.11.13 'potassium' (Barber 1995)



1698 2.1.11.13.1 'Cmin' = 0.002 [umol.ml-1]  
1699 2.1.11.13.2 'Imax' = 0.467 [umol.cm-2.day-1]  
1700 2.1.11.13.3 'Km' = 0.014 [umol.ml-1]  
1701 2.1.11.13.4 'minimal nutrient concentration' = 117 [umol.g-1]  
1702 2.1.11.13.5 'optimal nutrient concentration' = 234 [umol.g-1] (Silk et al. 1986)  
1703 2.1.11.14 'reduction in respiration due to aerenchyma' [100%]=f{'aerenchymaFormation'}  
1704 [100%] x,y pairs :{0 0 0.3 0.7 0.6 1} (Fan et al. 2003)  
1705 'reduction in respiration due to cell size' [100%]=f{cellSize} [100%] x,y pairs :{101 0  
1706 150 0.07 200 0.14 250 0.17 300 0.25 350 0.32 400 0.37 450 0.43 500 0.51 533 0.57}  
1707 'reduction in respiration due to file number' [100%]=f{filenumber} [100%] x,y pairs :{17  
1708 0 16 0.05 15 0.13 14 0.17 13 0.23 12 0.3 11 0.35 10 0.42 9 0.49 8 0.52}  
1709 2.1.11.15 'relative carbon cost of exudation' [g.cm-1.day-1]=f{'age'} [day] x,y pairs :{0  
1710 5e-06 100  
1711 5e-06} (Groleau-Renaud et al. 1998)  
1712 2.1.11.16 'relative respiration' [g.g-1.day-1]=f{'age'} [day] x,y pairs :{0 0.09 2 0.04 6  
1713 0.04 1000  
1714 0.04} (Fan et al., 2003)  
1715 2.1.11.17 'root class id' = 101 [-]  
1716 2.1.11.18 'root hair density' [#.cm-2]=f{'age'} [day] x,y pairs :{0 2000 1 2000 2 2000 10  
1717 2000 30 0  
1718 2000 0} (Zhu et al. 2005; Mackay and S. Barber 1985)  
1719 2.1.11.19 'root hair diameter' = 0.0005 [cm]  
1720 2.1.11.20 'root hair length' [cm]=f{'age'} [day] x,y pairs :{0 0 1 0 2 0.028 2000 0.028}  
1721 2.4.15.20  
1722 (Zhu et al. 2005; Mackay and S. Barber 1985)  
1723 2.1.11.21 'soil impedence.v2' [cm]=f{'uniform distribution'} minimum=-0.02  
1724 maximum=0.02  
1725 2.1.12 'primary root'  
1726 2.1.12.1 'aerenchyma formation' [100%]=f{'age'} [day] x,y pairs :{0 0 3 0 5 0.1 10 0.25  
1727 20 0.393 1000 0.393} (Fan et al. 2003)  
1728 'cell size' [um^2]={101 150 200 250 300 350 400 450 500 533} (Chimungu et al., 2014a)  
1729 'cell file number' [#]={8 9 10 11 12 13 14 15 16 17}  
1730 2.1.12.2 'branch list'  
1731 2.1.12.2.1 'lateral'  
1732 2.1.12.2.1.1 'allow branches to form above ground' = 0 [-]  
1733 2.1.12.2.1.2 'branching frequency' [cm]=f{'uniform distribution'} minimum=0.25  
1734 maximum=0.45  
1735 2.1.12.2.1.3 'length root tip' = 10.93 [cm]  
1736 2.1.12.2.2 'seminal'  
1737 2.1.12.2.2.1 'allow branches to form above ground' = 0 [-]  
1738 2.1.12.2.2.2 'branching frequency' = 1 [cm]  
1739 2.1.12.2.2.3 'branching time offset' = 1 [day]  
1740 2.1.12.2.2.4 'max number of branches' = 5 [#]  
1741 2.1.12.2.2.5 'number of branches/whorl' = 5 [#]  
1742 2.1.12.3 'branching angle' = 0 [degrees]  
1743 2.1.12.4 'density' = 0.094 [g.cm-3]  
1744 2.1.12.5 'diameter' = 0.065 [cm]  
1745 2.1.12.6 'gravitropism' = 0.01 [-]

1746 2.1.12.7 'gravitropism.v2' [cm]=f{'uniform distribution'} minimum=-0.015 maximum=-  
1747 0.005  
1748 2.1.12.8 'growth rate' [cm.day-1]=f{'age'} [day] x,y pairs :{0 4.5 28 4.5 38 0 1000 0}  
1749 2.1.12.9 'length root tip without xylem vessels' = 2 [cm]  
1750 2.1.12.10 'nitrate'  
1751 2.1.12.10.1 ' Cmin' = 0.001 [umol.ml-1]  
1752 2.1.12.10.2 ' Imax' [umol.cm-2.day-1]=f{'age'} [day] x,y pairs :{0 2.3 2 1.92 40 1.92}  
1753 2.1.12.10.3 ' Km' [umol.ml-1]=f{'age'} [day] x,y pairs :{0 0.0105 2 0.0161 40 0.0161}  
1754 2.1.12.10.4 'minimal nutrient concentration' = 600 [umol.g-1]  
1755 2.1.12.10.5 'optimal nutrient concentration' = 1200 [umol.g-1]  
1756 2.1.12.11 'number of xylem poles' = 8 [-]  
1757 2.1.12.12 'phosphorus' (Barber 1995)  
1758 2.1.12.12.1 ' Cmin' = 0.0002 [umol.ml-1]  
1759 2.1.12.12.2 ' Imax' = 0.0555 [umol.cm-2.day-1]  
1760 2.1.12.12.3 ' Km' = 0.00545 [umol.ml-1]  
1761 2.1.12.12.4 'minimal nutrient concentration' = 30 [umol.g-1]  
1762 2.1.12.12.5 'optimal nutrient concentration' = 60 [umol.g-1]  
1763 2.1.12.13 'potassium' (Barber 1995)  
1764 2.1.12.13.1 ' Cmin' = 0.002 [umol.ml-1]  
1765 2.1.12.13.2 ' Imax' = 0.467 [umol.cm-2.day-1]  
1766 2.1.12.13.3 ' Km' = 0.014 [umol.ml-1]  
1767 2.1.12.13.4 'minimal nutrient concentration' = 117 [umol.g-1]  
1768 2.1.12.13.5 'optimal nutrient concentration' = 234 [umol.g-1] (Silk et al. 1986)  
1769 2.1.12.14 'radial hydraulic conductivity' [cm.day-1.hPa-1]=f{'time since planting'} [day]  
1770 x,y pairs : {0 0 1 0.000216 10 0.000216 20 0.000216 30 0.000116 40 5e-05 60 0}  
1771 2.1.12.15 'reduction in respiration due to aerenchyma' [100%]=f{'aerenchymaFormation'}  
1772 [100%] x,y pairs :{0 0 0.3 0.7 0.6 1} (Fan et al. 2003)  
1773 'reduction in respiration due to cell size' [100%]=f{'cellSize'} [100%] x,y pairs :{101 0  
1774 150 0.07 200 0.14 250 0.17 300 0.25 350 0.32 400 0.37 450 0.43 500 0.51 533 0.57}  
1775 'reduction in respiration due to file number' [100%]=f{'filenumber'} [100%] x,y pairs :{17  
1776 0 16 0.05 15 0.13 14 0.17 13 0.23 12 0.3 11 0.35 10 0.42 9 0.49 8 0.52}  
1777 2.1.12.16 'relative carbon cost of exudation' [g.cm-1.day-1]=f{'age'} [day] x,y pairs :{0  
1778 5e-06 100  
1779 5e-06} (Groleau-Renaud et al. 1998)  
1780 2.1.12.17 'relative respiration' [g.g-1.day-1]=f{'age'} [day] x,y pairs :{0 0.09 2 0.04 6  
1781 0.04 1000  
1782 0.04} (Fan et al., 2003)  
1783 2.1.12.18 'root class id' = 100 [-]  
1784 2.1.12.19 'root hair density' [#.cm-2]=f{'age'} [day] x,y pairs :{0 2000 1 2000 2 2000 10  
1785 2000 30 0  
1786 2000 0} (Zhu et al. 2005; Mackay and S. Barber 1985)  
1787 2.1.12.20 'root hair diameter' = 0.0005 [cm]  
1788 2.1.12.21 'root hair length' [cm]=f{'age'} [day] x,y pairs :{0 0 1 0 2 0.028 2000 0.028}  
1789 2.4.15.20  
1790 (Zhu et al. 2005; Mackay and S. Barber 1985)  
1791 2.1.12.22 'soil impedance' = 0.05 [-]  
1792 2.1.12.23 'soil impedance.v2' [cm]=f{'uniform distribution'} minimum=-0.05  
1793 maximum=0.05  
1794 2.1.13 'resources'

1795 2.1.13.1 'carbon to dry weight ratio' = 0.45 [100%]  
1796 2.1.13.2 'carbon allocation2 leafs factor' [100%]=f{'time'} [day] x,y pairs :{0 1 10 0.7 20  
1797 0.45 33  
1798 0.42 40 0.4 60 0.4}  
1799 2.1.13.3 'carbon allocation2 roots factor' [100%]=f{'time'} [day] x,y pairs :{0 1 1 1 6 0.4  
1800 20 0.2  
1801 40 0.17 80 0.17}  
1802 2.1.13.4 'carbon cost of nitrate uptake' = 1.392e-05 [g.umol-1]  
1803 2.1.13.5 'max carbon allocation2 shoot' = 0.82 [100%]  
1804 2.1.13.6 'nitrate'  
1805 2.1.13.6.1 'initial nutrient uptake' = 285 [umol]  
1806 2.1.13.7 'phosphorus' (Barber 1995)  
1807 2.1.13.7.1 'initial nutrient uptake' = 20 [umol]  
1808 2.1.13.8 'potassium' (Barber 1995)  
1809 2.1.13.8.1 'initial nutrient uptake' = 27 [umol]  
1810 2.1.13.9 'reserve allocation rate' [%.day-1]=f{'time'} [day] x,y pairs :{0 0.01 1 0.02 2  
1811 0.04 3 0.04  
1812 10 0.2 11 0.2 1000 0.2}  
1813 2.1.13.10 'seed size' = 0.15 [g]  
1814 2.1.14 'seminal'  
1815 2.1.14.1 'aerenchyma formation' [100%]=f{'age'} [day] x,y pairs :{0 0 3 0 5 0.1 10 0.25  
1816 20 0.393 1000 0.393} (Fan et al. 2003)  
1817 'cell size' [um<sup>2</sup>]={101 150 200 250 300 350 400 450 500 533} (Chimungu et al., 2014a)  
1818 'cell file number' [#]={8 9 10 11 12 13 14 15 16 17}  
1819 2.1.14.2 'branch list'  
1820 2.1.14.2.1 'lateral'  
1821 2.1.14.2.1.1 'allow branches to form above ground' = 0 [-]  
1822 2.1.14.2.1.2 'branching frequency' [cm]=f{'uniform distribution'} minimum=0.05  
1823 maximum=0.25  
1824 2.1.14.2.1.3 'length root tip' = 10.93 [cm]  
1825 2.1.14.3 'branching angle' = 90 [degrees]  
1826 2.1.14.4 'density' = 0.094 [g.cm-3]  
1827 2.1.14.5 'diameter' = 0.085 [cm]  
1828 2.1.14.6 'gravitropism' = 0.004 [-]  
1829 2.1.14.7 'gravitropism.v2' [cm]=f{'uniform distribution'} minimum=-0.035 maximum=-  
1830 0.025  
1831 2.1.14.8 'growth rate' [cm.day-1]=f{'age'} [day] x,y pairs :{0 0.01 1 0.5 2 4.5 28 4.5 38 0  
1832 100 0}  
1833 2.1.14.9 'length root tip without xylem vessels' = 2 [cm]  
1834 2.1.14.10 'longitudinal growth rate multiplier' [cm]= f{'normal distribution'}  
1835 minimum=0.6  
1836 maximum=1.2 mean=1 stdev=0.1  
1837 2.1.14.11 'nitrate'  
1838 2.1.14.11.1 ' Cmin' = 0.001 [umol.ml-1]  
1839 2.1.14.11.2 ' Imax' [umol.cm-2.day-1]=f{'age'} [day] x,y pairs :{0 2.3 2 1.92 40 1.92}  
1840 2.1.14.11.3 ' Km [umol.ml-1]=f{'age'} [day] x,y pairs :{0 0.0105 2 0.0161 40 0.0161}  
1841 2.1.14.11.4 'minimal nutrient concentration' = 600 [umol.g-1]  
1842 2.1.14.11.5 'optimal nutrient concentration' = 1200 [umol.g-1]  
1843 2.1.14.12 'number of xylem poles' = 6 [-]

1844 2.1.14.13 'phosphorus' (Barber 1995)  
1845 2.1.14.13.1 'Cmin' = 0.0002 [umol.ml-1]  
1846 2.1.14.13.2 'Imax' = 0.0555 [umol.cm-2.day-1]  
1847 2.1.14.13.3 'Km' = 0.00545 [umol.ml-1]  
1848 2.1.14.13.4 'minimal nutrient concentration' = 30 [umol.g-1]  
1849 2.1.14.13.5 'optimal nutrient concentration' = 60 [umol.g-1] 2.1.14.14 'potassium' (Barber  
1850 1995)  
1851 2.1.14.14.1 'Cmin' = 0.002 [umol.ml-1]  
1852 2.1.14.14.2 'Imax' = 0.467 [umol.cm-2.day-1]  
1853 2.1.14.14.3 'Km' = 0.014 [umol.ml-1]  
1854 2.1.14.14.4 'minimal nutrient concentration' = 117 [umol.g-1]  
1855 2.1.14.14.5 'optimal nutrient concentration' = 234 [umol.g-1] (Silk et al. 1986)  
1856 2.1.14.15 'reduction in respiration due to aerenchyma' [100%]=f{'aerenchymaFormation'}  
1857 [100%] x,y pairs :{0 0 0.3 0.7 0.6 1} (Fan et al. 2003)  
1858 'reduction in respiration due to cell size' [100%]=f{cellSize} [100%] x,y pairs :{101 0  
1859 150 0.07 200 0.14 250 0.17 300 0.25 350 0.32 400 0.37 450 0.43 500 0.51 533 0.57}  
1860 'reduction in respiration due to file number' [100%]=f{filenumber} [100%] x,y pairs :{17  
1861 0 16 0.05 15 0.13 14 0.17 13 0.23 12 0.3 11 0.35 10 0.42 9 0.49 8 0.52}  
1862 2.1.14.16 'regular topology' = 1 [-]  
1863 2.1.14.17 'relative carbon cost of exudation' [g.cm-1.day-1]=f{'age'} [day] x,y pairs :{0  
1864 5e-06 100  
1865 5e-06} (Groleau-Renaud et al. 1998)  
1866 2.1.14.18 'relative respiration' [g.g-1.day-1]=f{'age'} [day] x,y pairs :{0 0.09 2 0.04 6  
1867 0.04 1000  
1868 0.04} (Fan et al., 2003)  
1869 2.1.14.19 'root class id' = 99 [-]  
1870 2.1.14.20 'root hair density' [#.cm-2]=f{'age'} [day] x,y pairs :{0 2000 1 2000 2 2000 10  
1871 2000 30 0  
1872 2000 0} (Zhu et al. 2005; Mackay and S. Barber 1985)  
1873 2.1.14.21 'root hair diameter' = 0.0005 [cm]  
1874 2.1.14.22 'root hair length' [cm]=f{'age'} [day] x,y pairs :{0 0 1 0 2 0.028 2000 0.028}  
1875 2.4.15.20  
1876 (Zhu et al. 2005; Mackay and S. Barber 1985)  
1877 2.1.14.23 'soil impedance' = 0.02 [-]  
1878 2.1.14.24 'soil impedance.v2' [cm]=f{'uniform distribution'}; minimum=-0.04  
1879 maximum=0.04  
1880 2.1.15 'shoot'  
1881 2.1.15.1 'area per plant' = 1600 [cm2]  
1882 2.1.15.2 'extinction coefficient' = 0.85 [-]  
1883 2.1.15.3 'leaf area expansion rate' [cm2.day-1]=f{'time'} [day] x,y pairs :{0 0 2 0 2.38  
1884 2.32 2.77 3.24 3.15 3.93 3.54 4.41 3.92 4.72 4.3 4.87 4.69 4.89 5.07 4.81 5.45 4.64 5.84 4.41 6.22  
1885 4.14 6.61 3.84 6.99 3.55 7.37 3.27 7.76 3.02 8.14 2.83 8.53 2.71 8.91 2.66 9.29 2.71 9.68 2.88  
1886 10.06 3.16 10.44 3.58 10.83 4.15 11.21 4.87 11.6 5.76 11.98 6.82 12.36 8.07 12.75 9.5 13.13  
1887 11.13 13.52 12.96 13.9 14.99 14.28 17.23 14.67 19.68 15.05 22.35 15.43 25.22 15.82 28.32 16.2  
1888 31.62 16.59 35.14 16.97 38.87 17.35 42.81 17.74 46.95 18.12 51.29 18.51 55.83 18.89 60.55  
1889 19.27 65.45 19.66 70.53 20.04 75.76 20.42 81.16 20.81 86.69 21.19 92.36 21.58 98.15 21.96  
1890 104.05 22.34 110.04 22.73 116.11 23.11 122.24 23.49 128.42 23.88 134.63 24.26 140.86 24.65  
1891 147.08 25.03 153.28 25.41 159.42 25.8 165.51 26.18 171.5 26.57 177.39 26.95 183.14 27.33  
1892 188.73 27.72 194.13 28.1 199.33 28.48 204.29 28.87 208.98 29.25 213.38 29.64 217.45 30.02

1893 221.18 30.4 224.52 30.79 227.44 31.17 229.92 31.56 231.91 31.94 233.39 33.09 234.36 50  
1894 234.36 80 0} (Zhang and Postma, University Park, unpublished)  
1895 2.1.15.4 'light use efficiency' = 3.8e-07 [g.umol-1] (Stirling et al. 1994; Postma,  
1896 University Park,unpublished)  
1897 2.1.15.5 'nitrate'  
1898 2.1.15.5.1 'leaf minimal nutrient concentration' [umol.g-1]=f{'time'} [day] x,y pairs :{0  
1899 1200 80  
1900 800}  
1901 2.1.15.5.2 'leaf optimal nutrient concentration' [umol.g-1]=f{'time'} [day] x,y pairs :{0  
1902 2500 80  
1903 1500} (Zhang and Postma, University Park, Unpublished; Alexandrova and Donovan 2003;  
1904 Chevalier and Schrader 1977)  
1905 2.1.15.5.3 'stem minimal nutrient concentration' = 400 [umol.g-1]  
1906 2.1.15.5.4 'stem optimal nutrient concentration' = 800 [umol.g-1]  
1907 2.1.15.6 'phosphorus'  
1908 2.1.15.6.1 'leaf minimal nutrient concentration' = 35 [umol.g-1]  
1909 2.1.15.6.2 'leaf optimal nutrient concentration' = 70 [umol.g-1] (Zhang and Postma,  
1910 University  
1911 Park, unpublished)  
1912 2.1.15.6.3 'stem minimal nutrient concentration' = 15 [umol.g-1]  
1913 2.1.15.6.4 'stem optimal nutrient concentration' = 30 [umol.g-1]  
1914 2.1.15.7 'potassium'  
1915 2.1.15.7.1 'leaf minimal nutrient concentration' = 273 [umol.g-1]  
1916 2.1.15.7.2 'leaf optimal nutrient concentration' = 508 [umol.g-1] (Leigh and Jones 1984)  
1917 2.1.15.7.3 'stem minimal nutrient concentration' = 117 [umol.g-1]  
1918 2.1.15.7.4 'stem optimal nutrient concentration' = 250 [umol.g-1]  
1919 2.1.15.8 'relative potential transpiration' = 100 [cm<sup>3</sup>.g-1] (Baldocchi 1994)  
1920 2.1.15.9 'relative respiration rate leafs' = 0.04 [g.g-1.day-1] (Postma, University Park,  
1921 Unpublished)  
1922 2.1.15.10 'relative respiration rate stems' = 0.02 [g.g-1.day-1]  
1923 2.1.15.11 'specific leaf area' [g.cm-2]=f{'time'} [day] x,y pairs :{0 0.0015 24 0.0026 50  
1924 0.0032  
1925 100 0.0032} (van Heemst 1988; Jacob and Lawlor 1991; Jaramillo, University Park,  
1926 unpublished)  
1927 2.1.16 'stress impact factors'  
1928 2.1.16.1 'impact on:leaf area expansion rate'  
1929 2.1.16.1.1 'impact by:nitrate' [-]=f{'nitrate stress factor'} [-] x,y pairs :{0 0 0.3 0.1 1 1}  
1930 (Sinclair and Horie 1989)  
1931 2.1.16.1.2 'impact by:phosphorus' [-]=f{'phosphorus stress factor'} [-] x,y pairs :{0 0 1 1}  
1932 (Lynch et al. 1991; Usuda and Shimogawara 1991) (Lynch et al. 1991; Usuda and Shimogawara  
1933 1991)  
1934 2.1.16.1.3 'impact by:potassium' [-]=f{'potassium stress factor'} [-] x,y pairs :{0 0 0.2 0.5  
1935 1 1}  
1936 2.1.16.2 'impact on:photosynthesis'  
1937 2.1.16.2.1 'impact by:nitrate' [-]=f{'nitrate stress factor'} [-] x,y pairs :{0 0 0.4 0.5 1 1}  
1938 (Sinclair  
1939 and Horie 1989)  
1940 2.1.16.2.2 'impact by:phosphorus' [-]=f{'phosphorus stress factor'} [-] x,y pairs :{0 0.5  
1941 0.5 1 1

- 1942 1} (Lynch et al. 1991; Usuda and Shimogawara 1991)  
1943 2.1.16.2.3 'impact by:potassium' [-]=f{'potassium stress factor'} [-] x,y pairs :{0 0 1 1}  
1944  
1945 Cited literature in appendix  
1946 Alexandrova, P. and Donovan, D., 2003. Nitrogen content and its uptake by maize as influenced by  
1947 some meteorological elements and fertilization. *International Agrophysics* , 17(2), p.41–46.  
1948 Baldocchi, D., 1994. A comparative study of mass and energy exchange rates over a closed C3  
1949 (wheat) and an open C4 (corn) crop: II. CO2 exchange and water use efficiency. *Agricultural and*  
1950 *Forest Meteorology*, 67(3-4), pp.291-321.  
1951 Barber, S.A., 1995. *Soil nutrient bioavailability: a mechanistic approach* , John Wiley and Sons,  
1952 New York, USA.  
1953 Bhadoria, P.B.S. et al., 1991. Soil Phosphate Diffusion Coefficients: Their Dependence on  
1954 Phosphorus Concentration and Buffer Power. *Soil Sci Soc Am J* , 55(1), pp.56-60.  
1955 Burton, A.L., 2010. Phenotypic Evaluation and Genetic Basis of Anatomical and Architectural  
1956 Root Traits in the Genus *Zea*. PhD dissertation. University Park: Penn State. Available at:  
1957 <http://etda.libraries.psu.edu/theses/approved/PSUonlyIndex/ETD-5741/index.html> [Accessed  
1958 February 9, 2011].  
1959 Chevalier, P. and Schrader, L.E., 1977. Genotypic Differences in Nitrate Absorption and  
1960 Partitioning of N Among Plant Parts in Maize. *Crop Sci* , 17(6), pp.897-901.  
1961 Claassen, N., Syring, K. and Jungk, A., 1986. Verification of a mathematical model by simulating  
1962 potassium uptake from soil. *Plant and Soil*, 95(2), pp.209-220.  
1963 Dunham, R.J. and Nye, P.H., 1976. The Influence of Soil Water Content on the Uptake of Ions by  
1964 Roots. III. Phosphate, Potassium, Calcium and Magnesium Uptake and Concentration Gradients  
1965 in Soil. *Journal of Applied Ecology*, 13(3), pp.967-984.  
1966 Fan, M., Zhu, J., et al., 2003. Physiological roles for aerenchyma in phosphorus-stressed roots.  
1967 *Functional Plant Biology*, 30(5), pp.493-506.  
1968 Groleau-Renaud, V., Plantureux, S. and Guckert, A., 1998. Influence of plant morphology on root  
1969 exudation of maize subjected to mechanical impedance in hydroponic conditions. *Plant and Soil*,  
1970 201(2), pp.231-239.  
1971 van Heemst, H.D.J., 1988. Plant data values required for simple crop growth simulation models:  
1972 review and bibliography. *Simulation Report CABO-TT*, Wageningen , 17, pp.0-100.  
1973 Hodnett, M.G. and Tomasella, J., 2002. Marked differences between van Genuchten soil water-  
1974 retention parameters for temperate and tropical soils: a new water-retention pedo-transfer  
1975 functions developed for tropical soils. *Geoderma* , 108(3-4), pp.155-180.  
1976 Jacob, J. and Lawlor, D.W., 1991. Stomatal and mesophyll limitations of photosynthesis in  
1977 phosphate deficient sunflower, maize and wheat plants. *Journal of Experimental Botany*, 42(8),  
1978 pp.1003-1011.  
1979 Leigh, R.A. and Jones, R.G.W., 1984. A Hypothesis Relating Critical Potassium Concentrations  
1980 for  
1981 Growth to the Distribution and Functions of this Ion in the Plant Cell. *New Phytologist* , 97(1),  
1982 pp.1-13.  
1983 Luo, L., Lin, H. and Halleck, P., 2008. Quantifying Soil Structure and Preferential Flow in Intact  
1984 Soil Using X-ray Computed Tomography. *Soil Sci Soc Am J* , 72(4), pp.1058-1069.  
1985 Lynch, J.P., Lauchli, A. and Epstein, E., 1991. Vegetative growth of the common bean in  
1986 response to phosphorus nutrition. *Crop Science*, 31(2), pp.380-387.  
1987 Mackay, A. and Barber, S., 1985. Effect of soil moisture and phosphate level on root hair growth  
1988 of corn roots. *Plant and Soil*, 86(3), pp.321-331.  
1989 Pahlavanian, A.M. and Silk, W.K., 1988. Effect of Temperature on Spatial and Temporal Aspects  
1990 of Growth in the Primary Maize Root. *Plant Physiology*, 87(2), pp.529-532.

- 1991 Silk, W.K. et al., 1986. Spatial Distributions of Potassium, Solutes, and Their Deposition Rates in  
1992 the Growth Zone of the Primary Corn Root. *Plant Physiol.*, 82(3), pp.853-858.  
1993 Sinclair, T.R. and Horie, T., 1989. Leaf Nitrogen, Photosynthesis, and Crop Radiation Use  
1994 Efficiency: A Review. *Crop Science*, 29(1), pp.90-98.  
1995 Stirling, C.M. et al., 1994. Changes in the photosynthetic light response curve during leaf  
1996 development of field grown maize with implications for modelling canopy photosynthesis.  
1997 *Photosynthesis Research*, 42(3), pp.217-225.  
1998 Usuda, H. and Shimogawara, K., 1991. Phosphate Deficiency in Maize. I. Leaf Phosphate Status,  
1999 Growth, Photosynthesis and Carbon Partitioning. *Plant and Cell Physiology*, 32(4), pp.497-504.  
2000 Yang, H.S. and Janssen, B.H., 2000. A mono-component model of carbon mineralization with a  
2001 dynamic rate constant. *European Journal of Soil Science*, 51(3), pp.517-529.  
2002 Zhu, J., Kaeppler, S.M. and Lynch, J.P., 2005. Mapping of QTL controlling root hair length in  
2003 maize (*Zea mays* L.) under phosphorus deficiency. *Plant and Soil* , 270(1), pp.299-310.
